# Supplementary material for: Key bacterial taxa and metabolic pathways affecting gut short-chain fatty acid profiles in early life
Source: PubMed Central journal article supplement (PMC8397723; doi:10.1038/s41396-021-00937-7), 2021-03-15
Supplement: 41396_2021_937_MOESM1_ESM.pdf [file 41396_2021_937_MOESM1_ESM.pdf]

## Supplementary Information

### Supplementary Text

#### Prediction of gut butyrate by microbiota composition with bacterial genome

The butyrate gene catalogue used in this study was originally applied for metagenomic data. In this study, we demonstrated the catalogue to also be useful for enumerating the potent butyrate production in combination with 16S rRNA gene-targeted microbiota composition data.

So far, the bioinformatics software package PICRUST2 has been developed and applied to predict metagenome functional content from 16S rRNA gene information. However, we found PICRUST2 to have limitations in predicting butyrate production; the prediction of butyrate by PICRUST2 did not match with the actual butyrate concentration (data not shown). It could, at least in part, be attributed to some important butyrate production-related genes (e.g. butyryl-CoA transferase of *F. prausnitzii*) not being associated with a KO category.

#### Metabolic consequences of infant bifidobacteria on HMO-derived carbohydrates

We confirmed that *B. infantis* IN-F29, *B. breve* JCM1192<sup>T</sup>, and *B. bifidum* YIT4039<sup>T</sup> (= ATCC29521<sup>T</sup>) grew in the presence of lactose and produced acetate and lactate at a ratio of approximately 3:2. *B. infantis* and *B. breve*, but not *B. bifidum*, produced acetate, formate, and 1,2-PD in the fucose-containing medium (Table S2). However, these three strains showed different phenotypes when cultured in medium containing 2'-FL (Fig. 6B and Table S2). The *B. infantis* strain grew in the medium, assimilating 2'-FL completely, and producing acetate, lactate, formate, and 1,2-PD. *B. bifidum* grew in the medium, produced acetate and lactate, and accumulated fucose in the supernatant. In contrast, *B. breve*, which lacks the FL transporter, was unable to grow in the medium containing 2'-FL. We subsequently co-cultured the *B. bifidum* and *B. breve* strains in 2'-FL medium to evaluate the substrate-cross-feeding, and confirmed our hypothesis that the combination of the strains could utilise the fucosylated HMO completely, and produce formate, 1,2-PD, acetate, and lactate.

#### Succinate-microbiota association in early life

We found positive association between Enterobacterales abundance and the succinate concentration with respect to age in some infants (Fig. S4 and S12), consistent with the report by Bittinger *et al.*<sup>51</sup>. On the other hand, less association was observed in the other infants, which implicate the involvement of the other bacterial taxa in gut succinate production. Previous study reported that gut microbes belonging to Bacteroidales (e.g. *Bacteroides thetaiotaomicron*) produce succinate<sup>52</sup>. Therefore, further studies are warranted to understand the involvement of other bacterial taxa, metabolic pathway, and substrate in early life gut succinate.

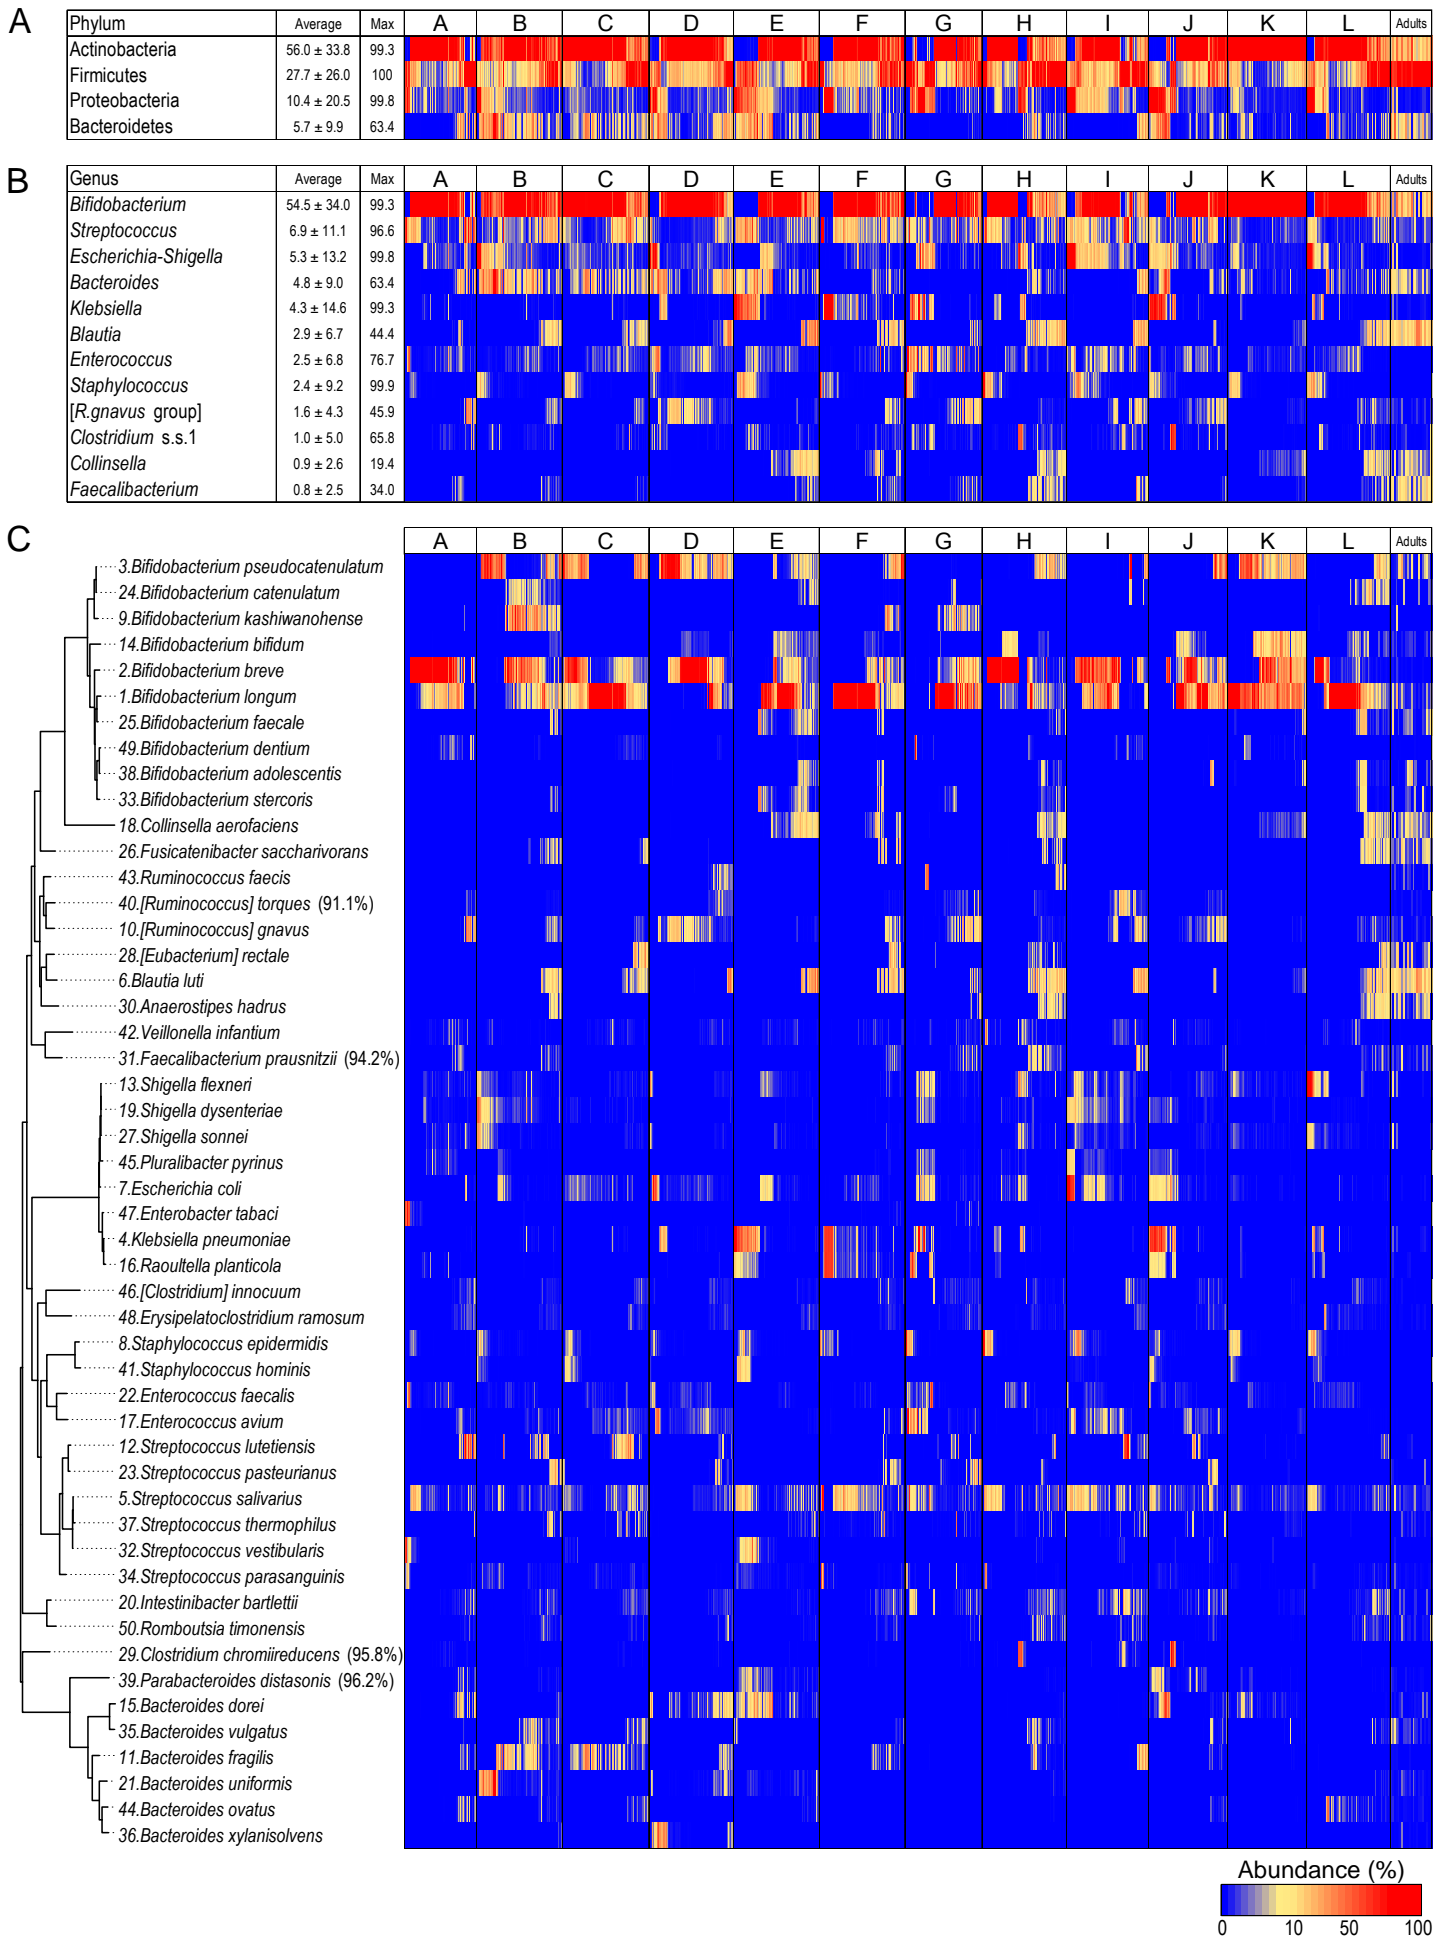

**Fig. S1. Age-dependent heatmap at different taxonomic levels.** Microbiota profiles of stool samples from 12 subjects are temporally ordered from left to right. **(A, B)** All phylum and top 12 genus heatmap and average abundance are shown. **(C)** The top 50 phylotypes are shown. Phylotype ID were allocated in average abundance order. Assigned species (or closest species with brackets showing % homology) are shown. Left tree represents the taxonomic relationship based on 16S rRNA sequences.

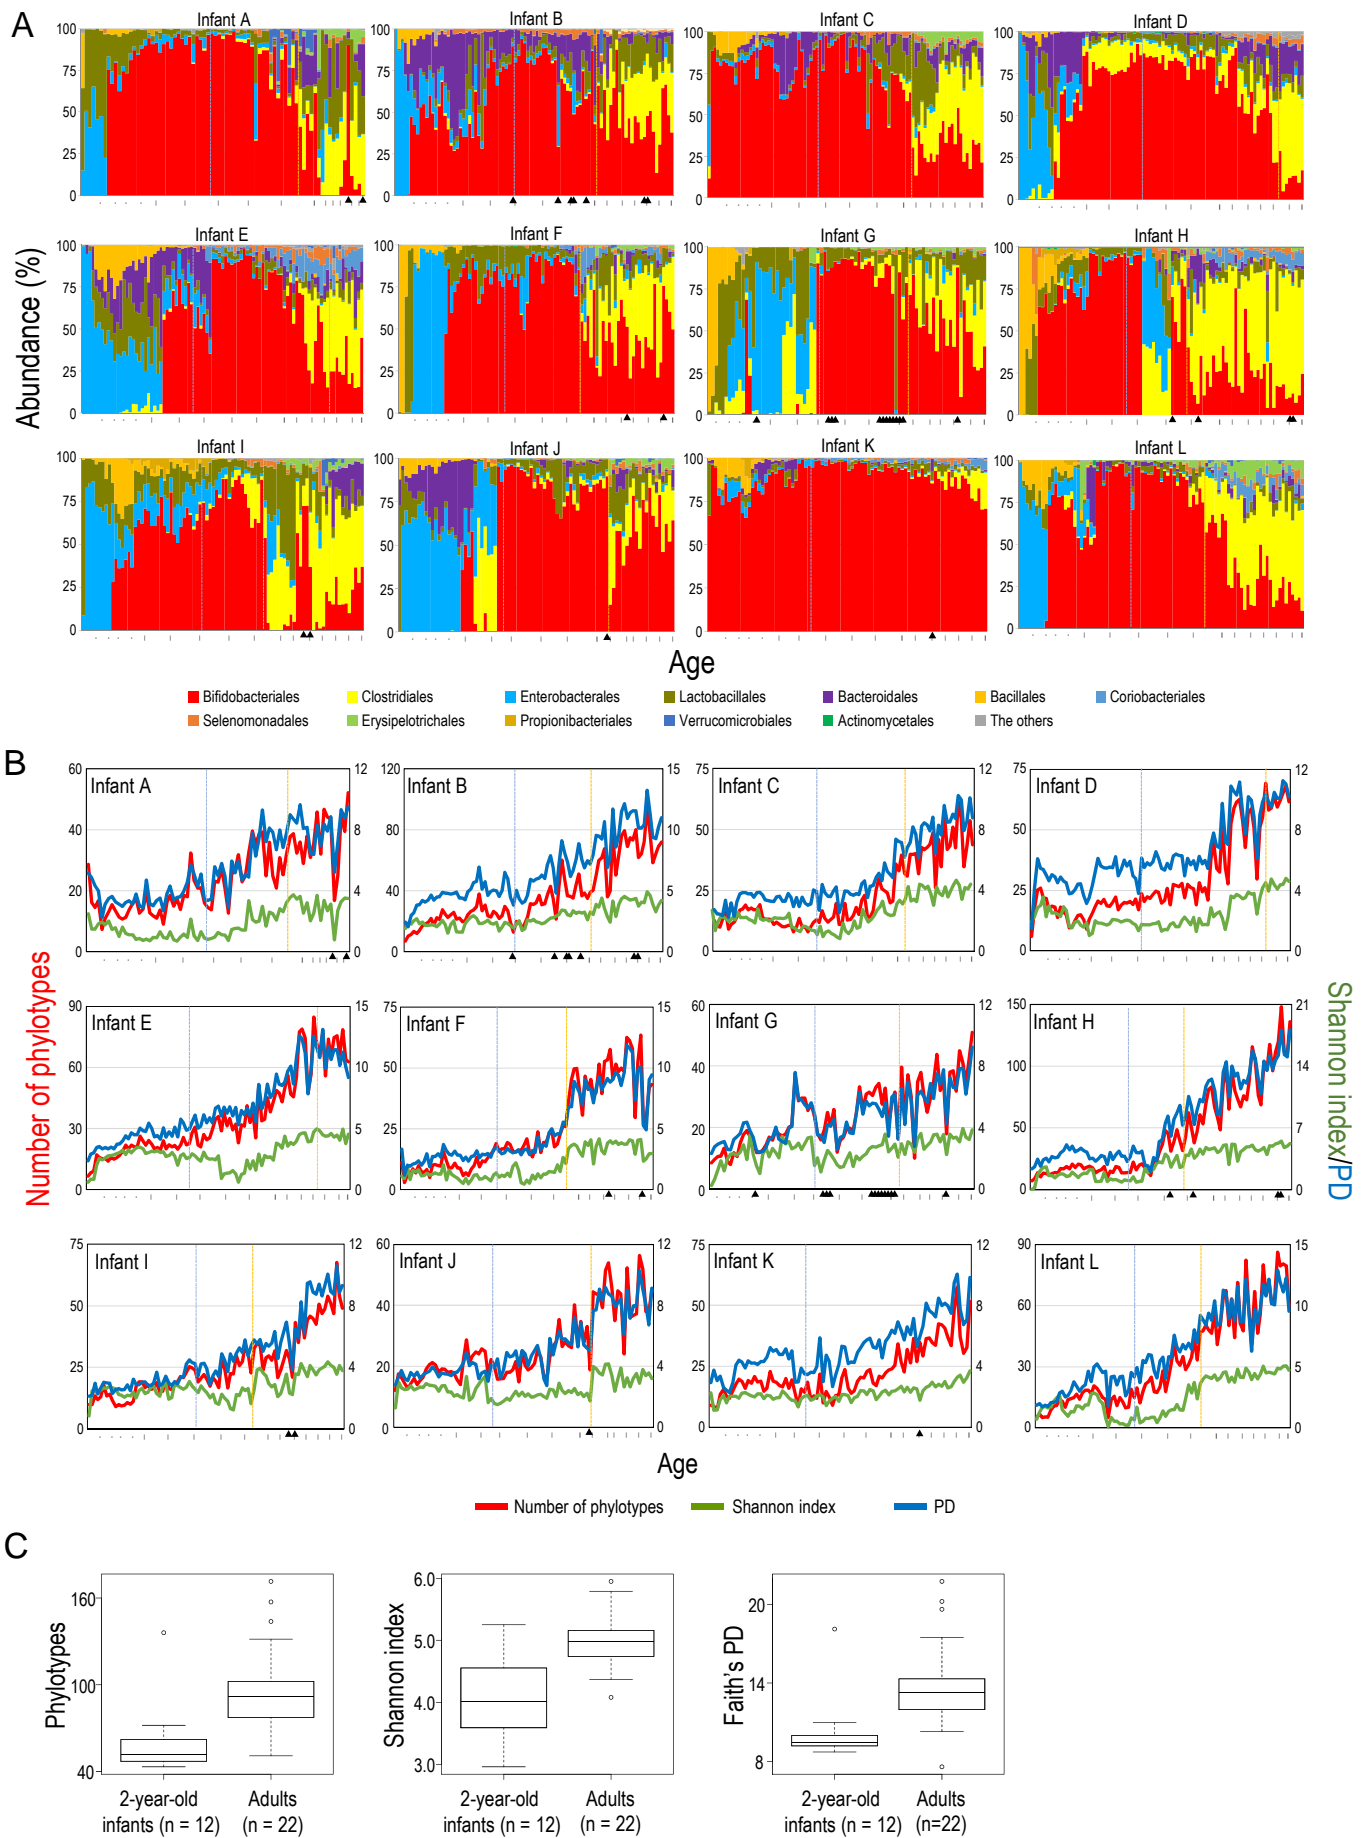

**Fig. S2. Dynamics and inter-individual variation of gut microbiota development during the first two years of life. (A)** Order-level dynamics of 12 infants are presented. Vertical bars along the x-axis indicate every two months. Dots along the x-axis indicate every week until one month. Blue and orange dotted vertical lines represent the initiation of solid food and cessation of breastfeeding, respectively. Black arrowheads along the x-axis indicate exposure to antibiotics. **(B)** Temporal shift of  $\alpha$ -diversity during the first two years. Number of phylotypes, Shannon index, and Faith's phylogenetic diversity (PD) of 12 infants are presented. **(C)** Comparison of  $\alpha$ -diversity between the two-year-old infants and adults. Number of phylotypes, Shannon index, and Faith's phylogenetic diversity (PD) of 12 infants and those of their parents ( $n = 22$ ) are compared.

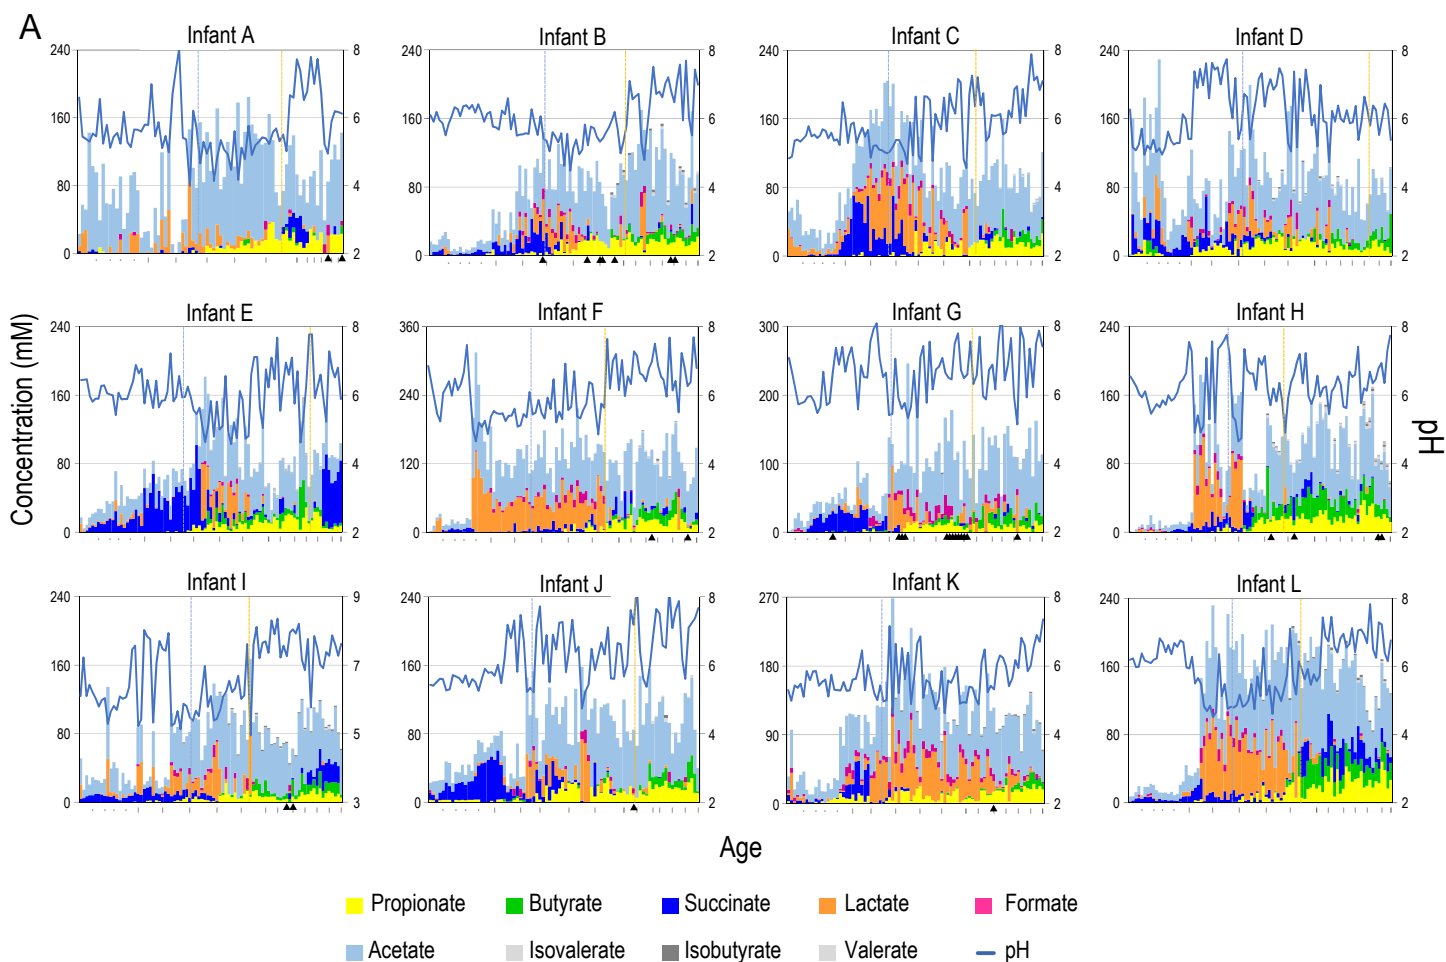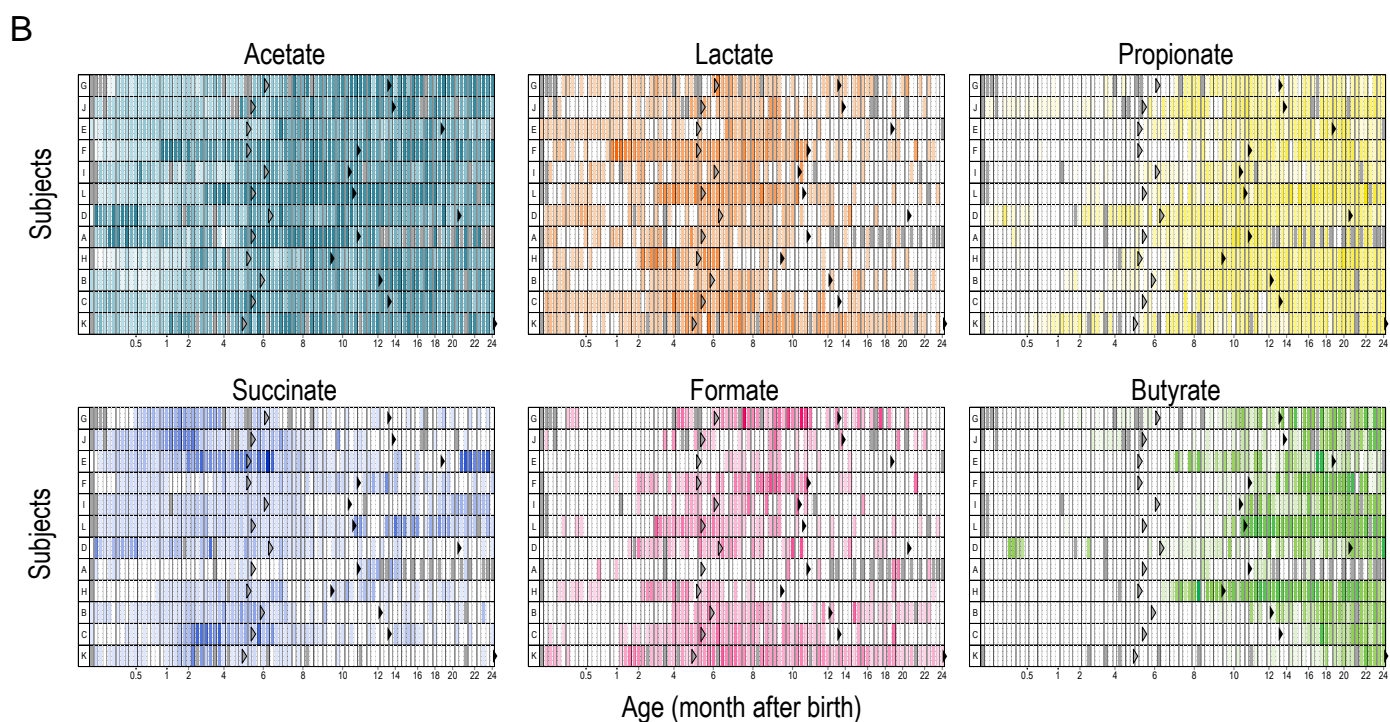

**Fig. S3. Dynamics and inter-individual variation of gut SCFA profiles and pH.** (A) Vertical bars along the x-axis indicate every two months. Dots along the x-axis indicate every week until one month. Blue and orange dotted vertical lines indicate the initiation of solid food and cessation of breastfeeding, respectively. Arrowheads along the x-axis indicate exposure to antibiotics. (B) Relationship between gut SCFAs and feeding. Gray and black arrowheads indicate the initiation of solid food and cessation of breastfeeding, respectively. Concentrations of gut SCFA were shown with respect to age in heatmap. Maximum concentration of acetate, propionate, butyrate, succinate, lactate, and formate were 183, 48, 61, 97, 140, and 31 mM, respectively. The subjects were ordered as in Fig. 1F.

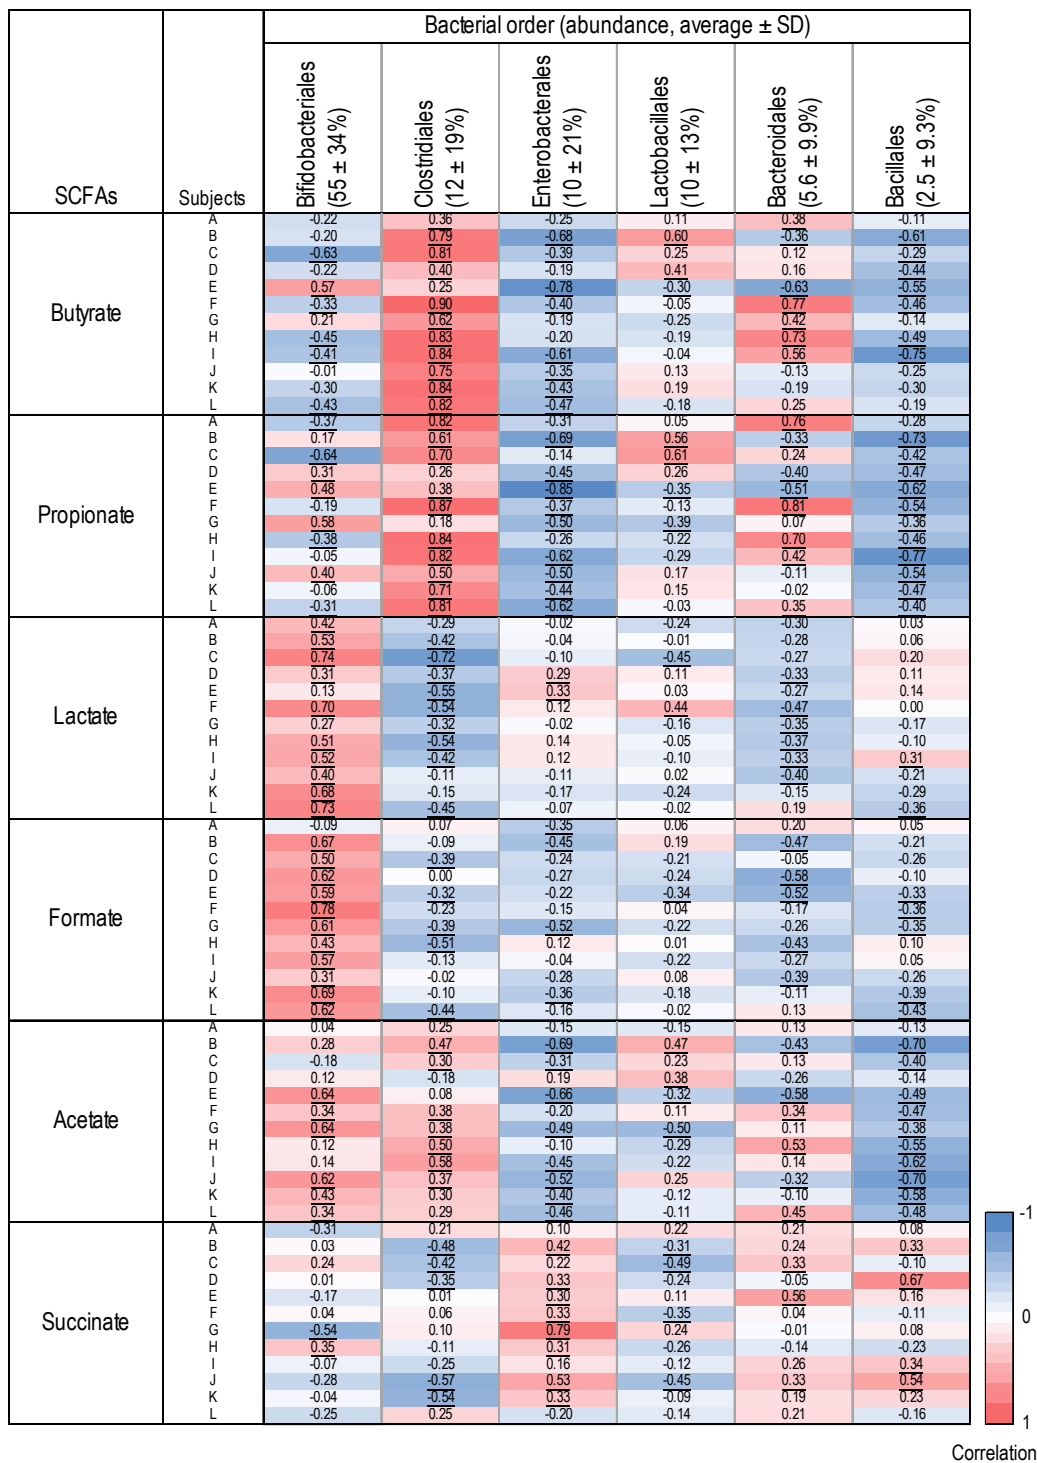

**Fig. S4. Heatmap visualisation of within-subject correlation between gut SCFAs and bacterial abundance at order-level.** Numbers represent  $r$  values for each infant (Spearman's correlation). FDR-corrected  $p$  values  $< 0.01$  are underlined. Top 6 bacterial lineages are presented.

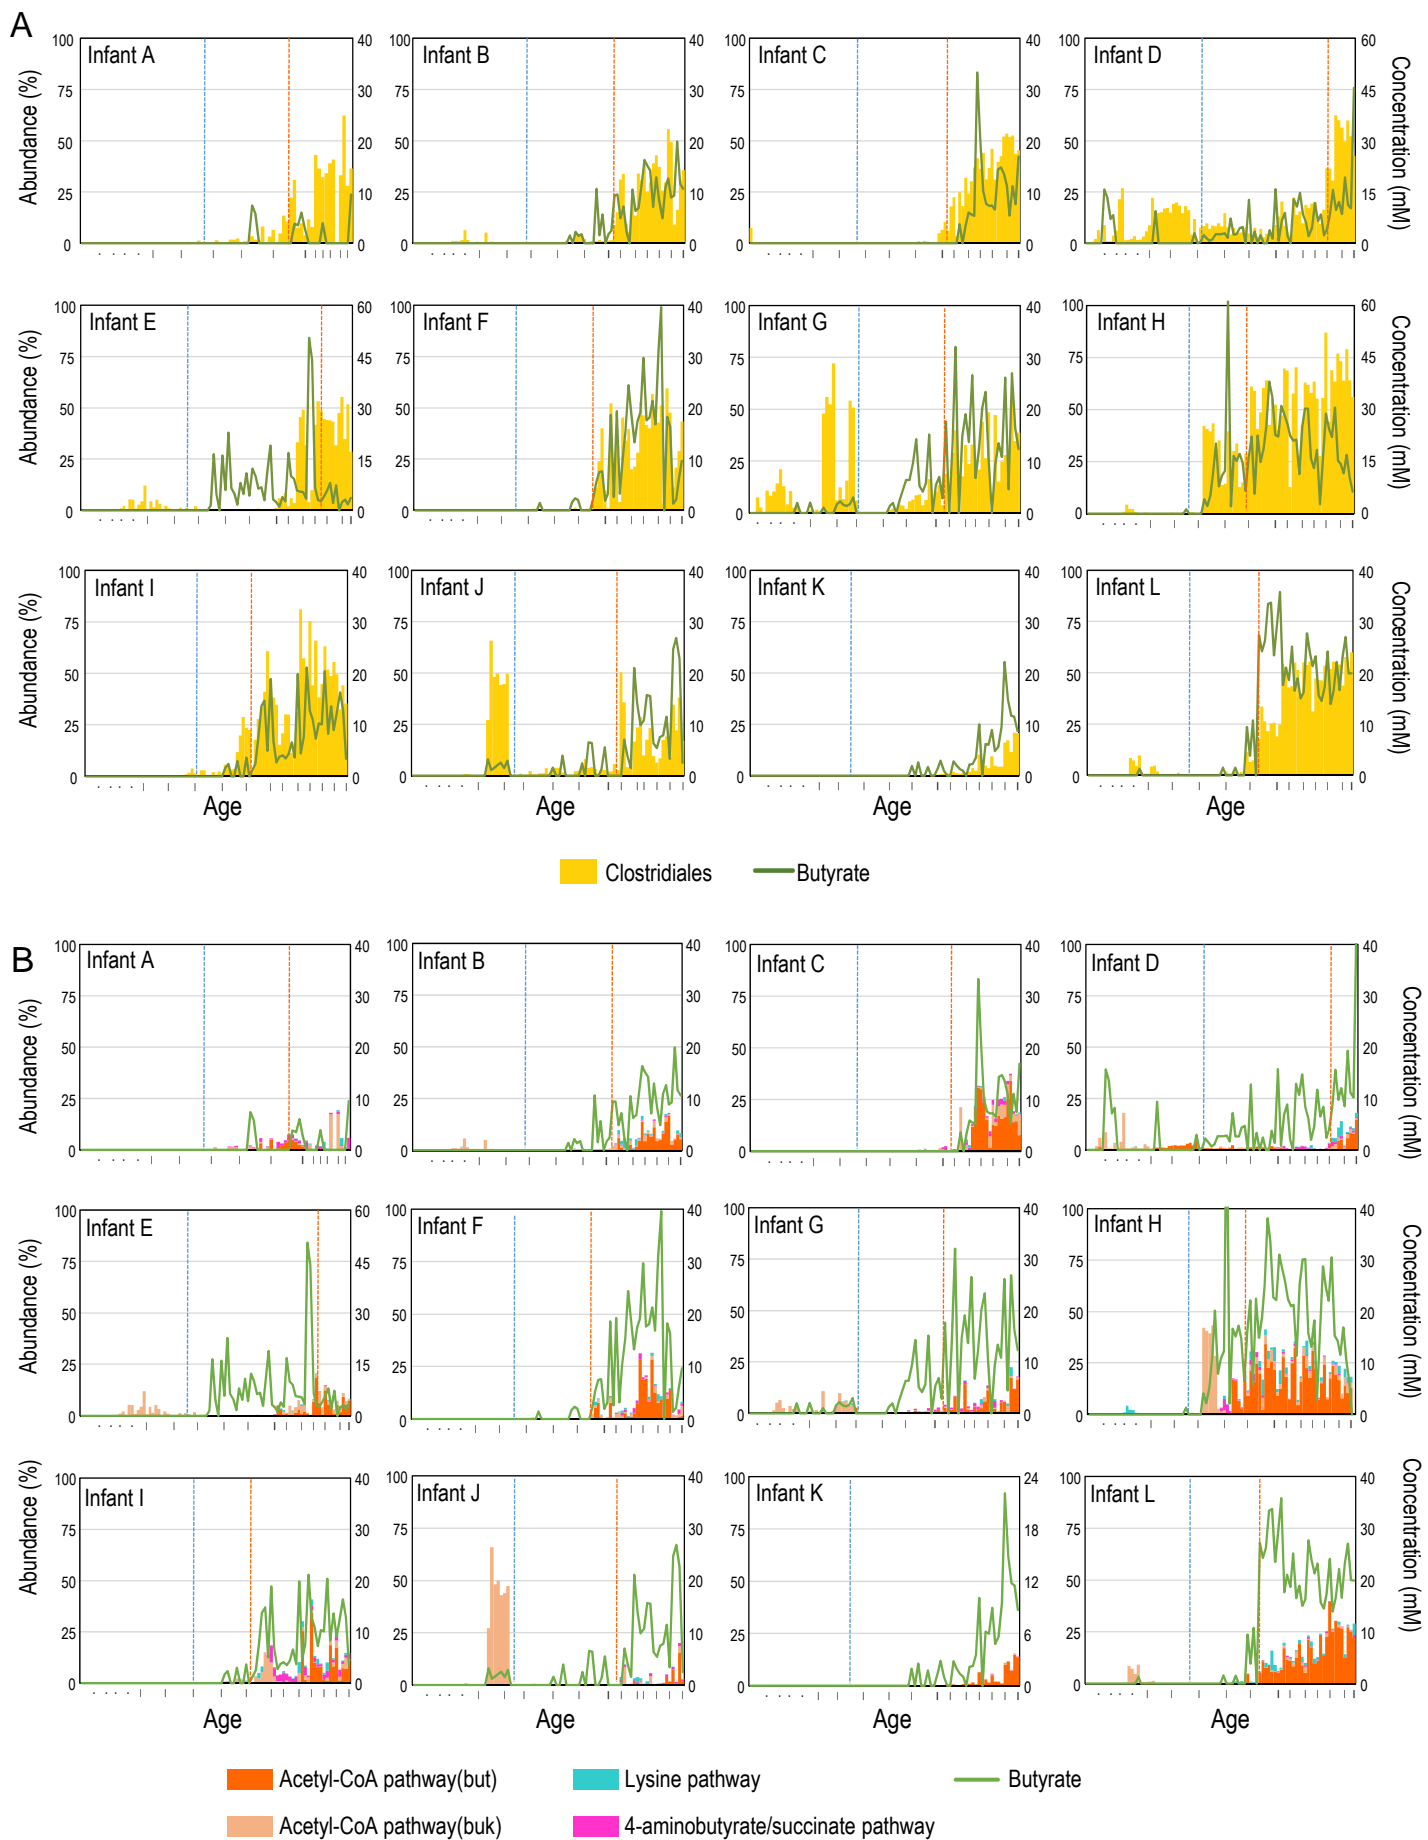

**Fig. S5. Association between Clostridiales and gut butyrate.** Vertical bars along the x-axis represent every two months. Dots along the x-axis indicate every week until one month. Blue and orange dotted vertical lines indicate the initiation of solid food and cessation of breastfeeding, respectively. **(A)** Clostridiales abundance and butyrate concentrations with respect to age. **(B)** Abundance of potent butyrate producing Clostridiales and faecal butyrate concentration with respect to age. The Clostridiales phylotypes having any pathway(s) for butyrate production are represented as stacked bar graphs.

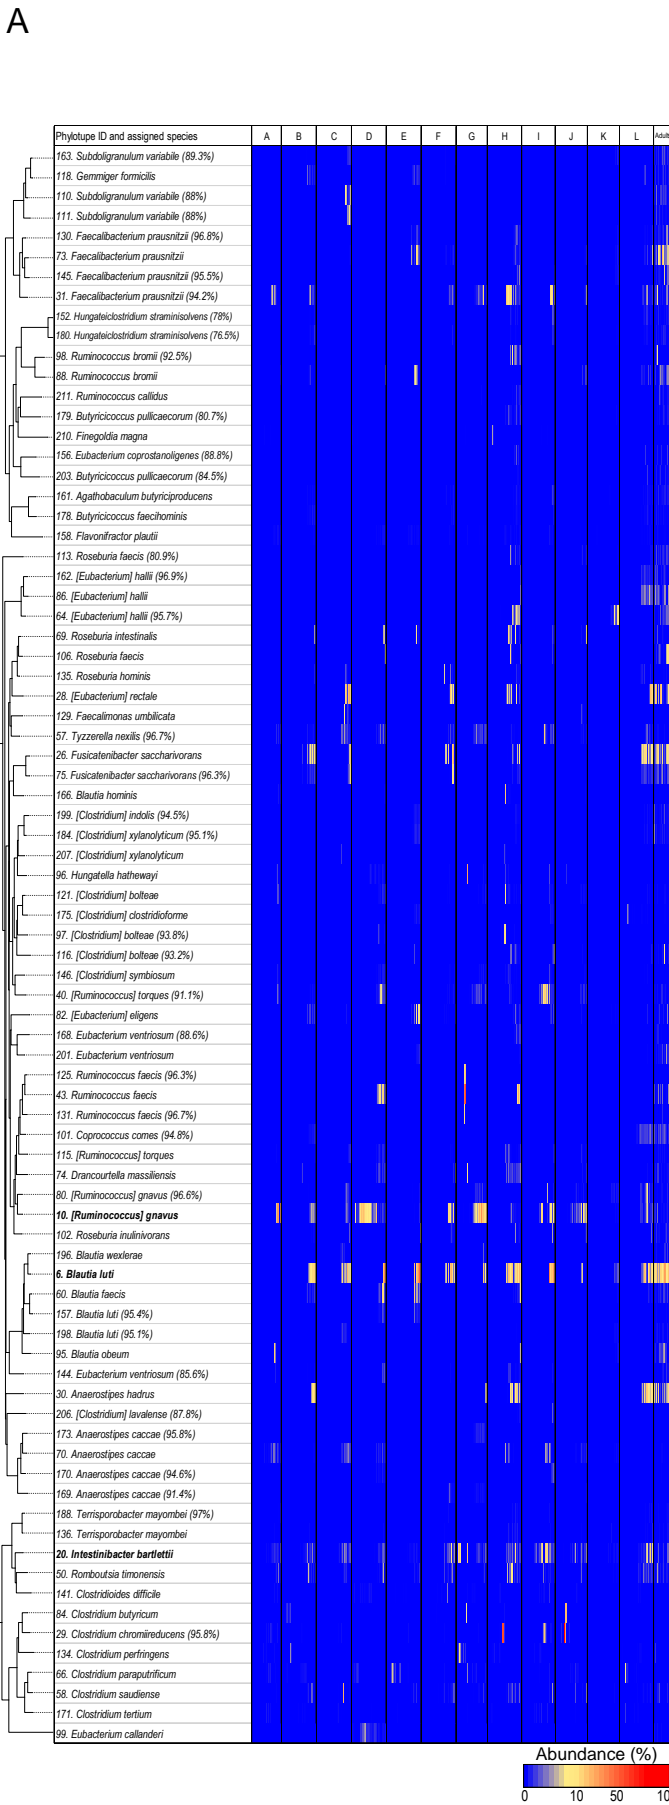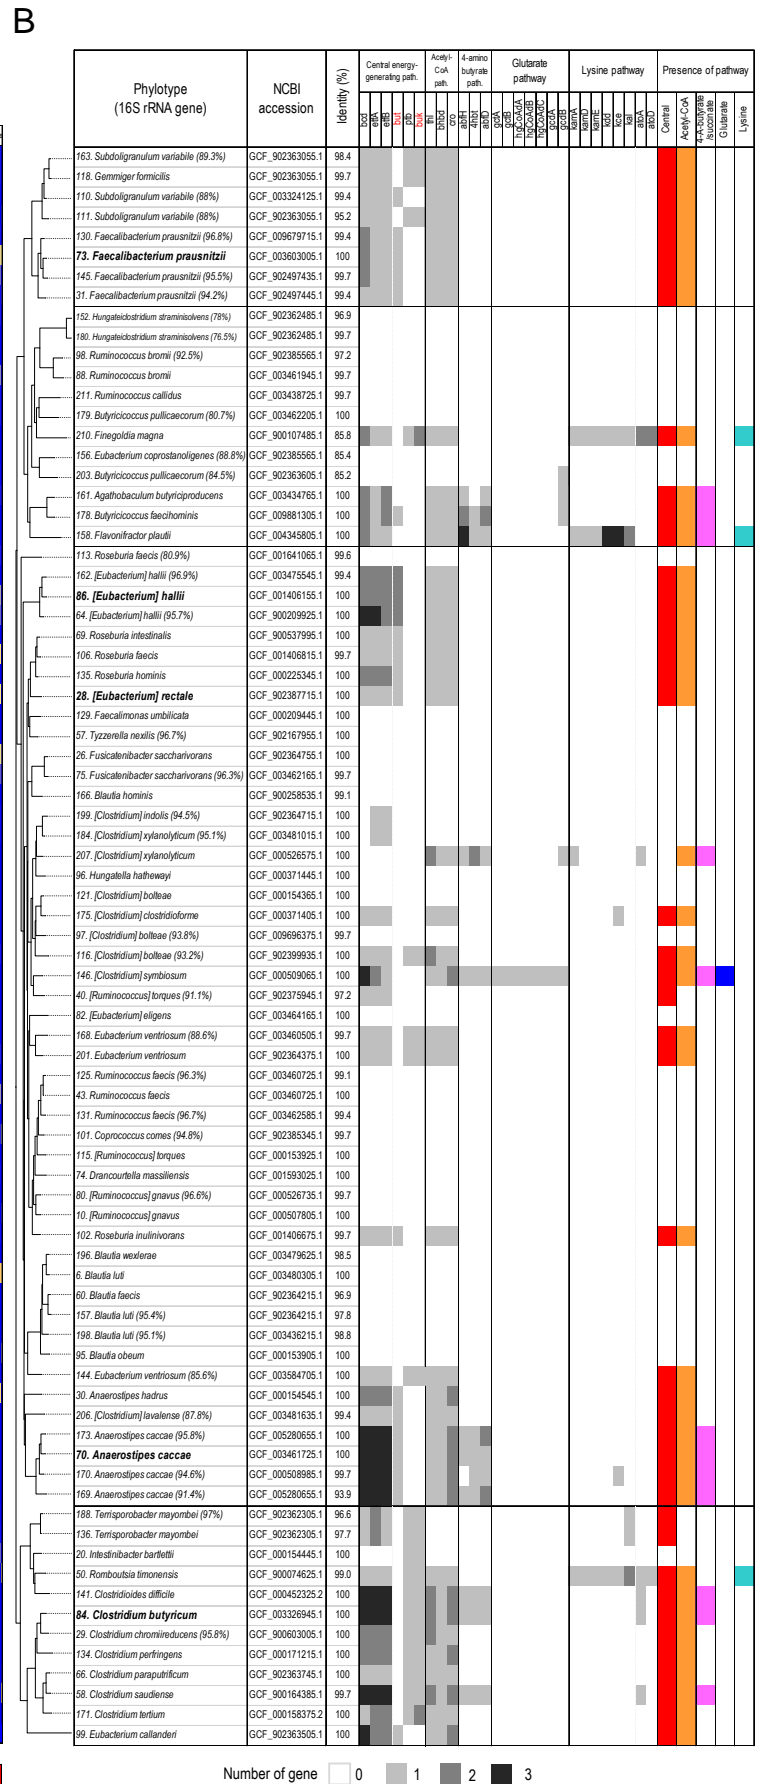

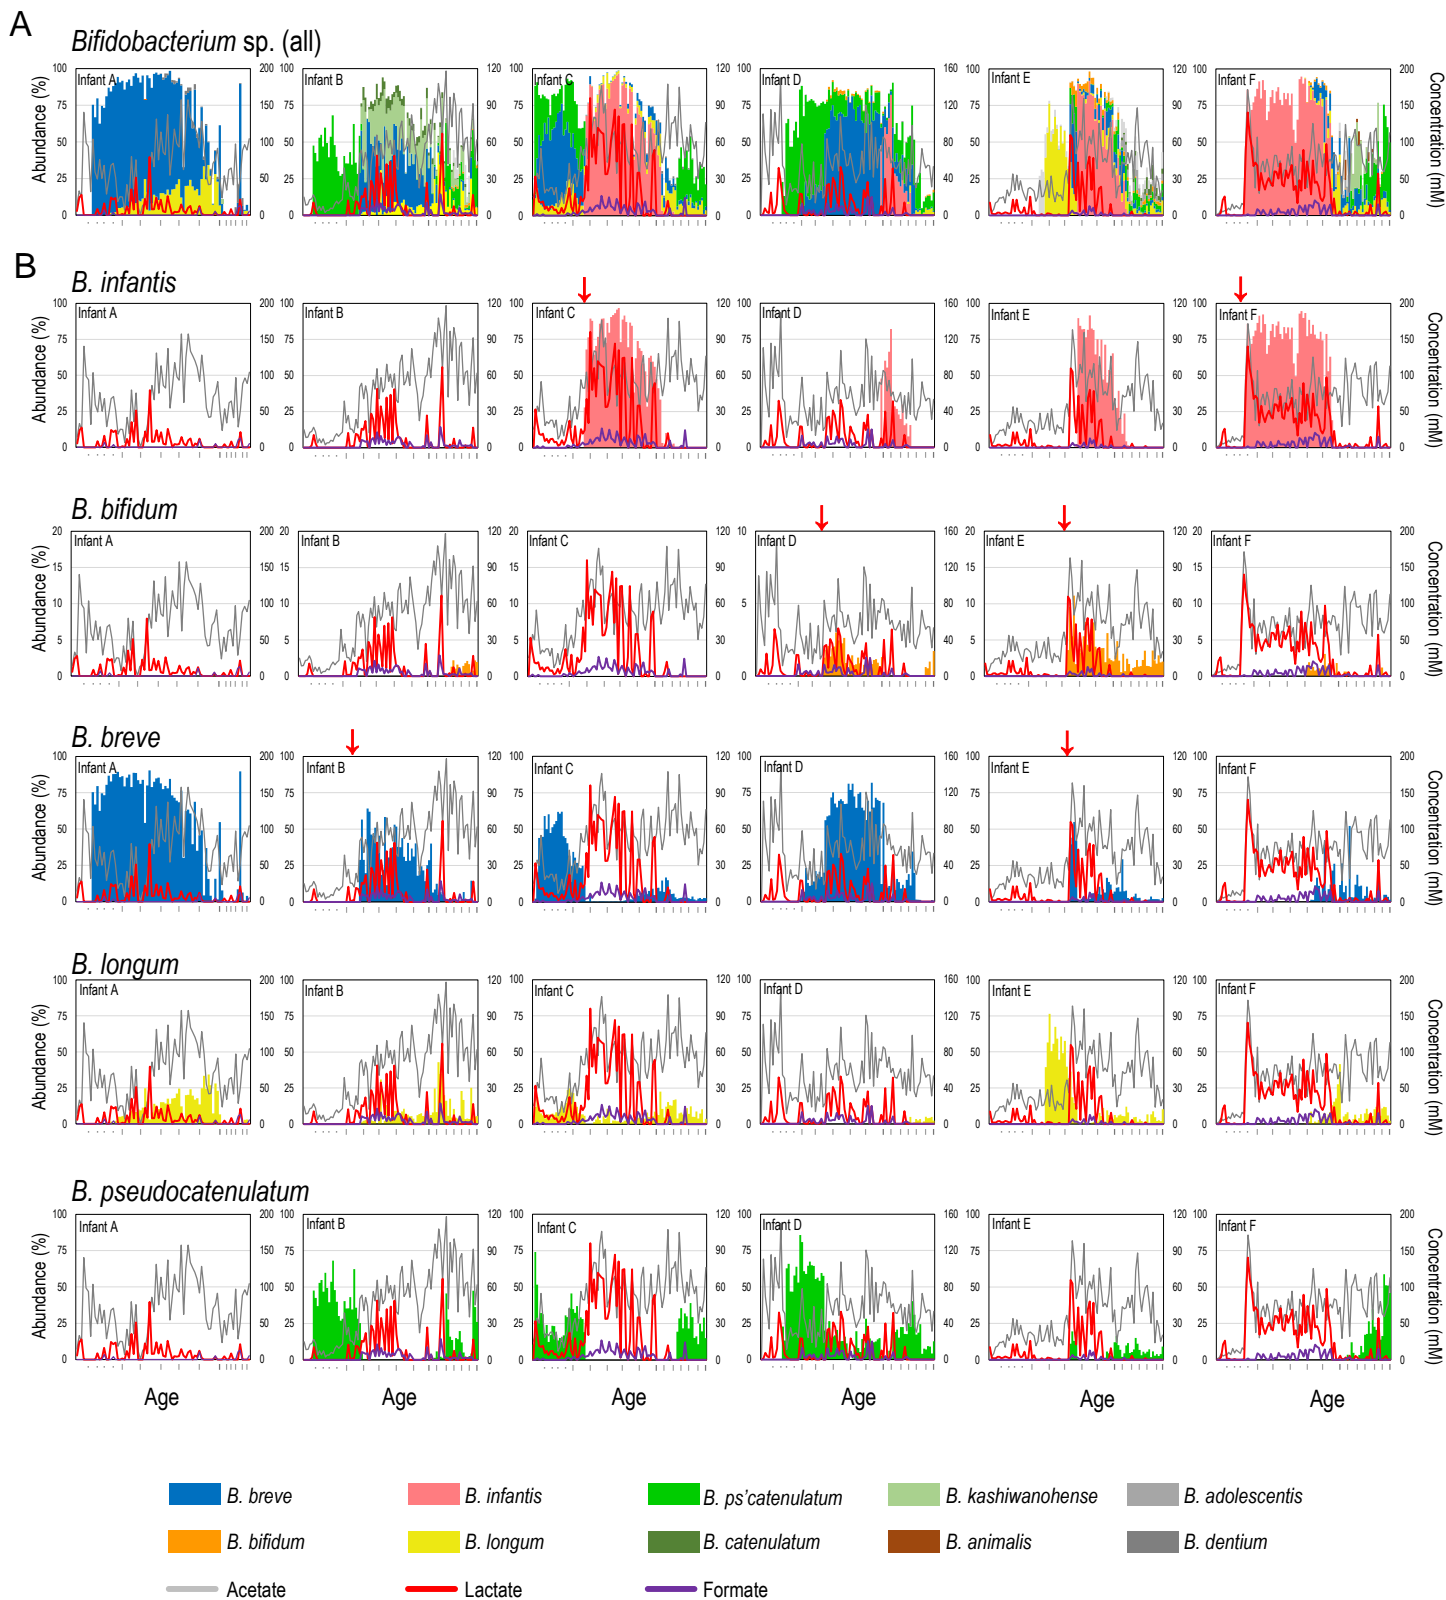

**Fig. S7 (Subjects A to F). *Bifidobacterium* species abundance and SCFA concentrations with respect to age. (A) All bifidobacterial species. (B) Each bifidobacterial species. Red arrow above the graph represent the increase in SCFA concentration coupled with increased bifidobacterial species abundance. Vertical bars along the x-axis represent every two months. Dots along the x-axis indicate every week until one month.**



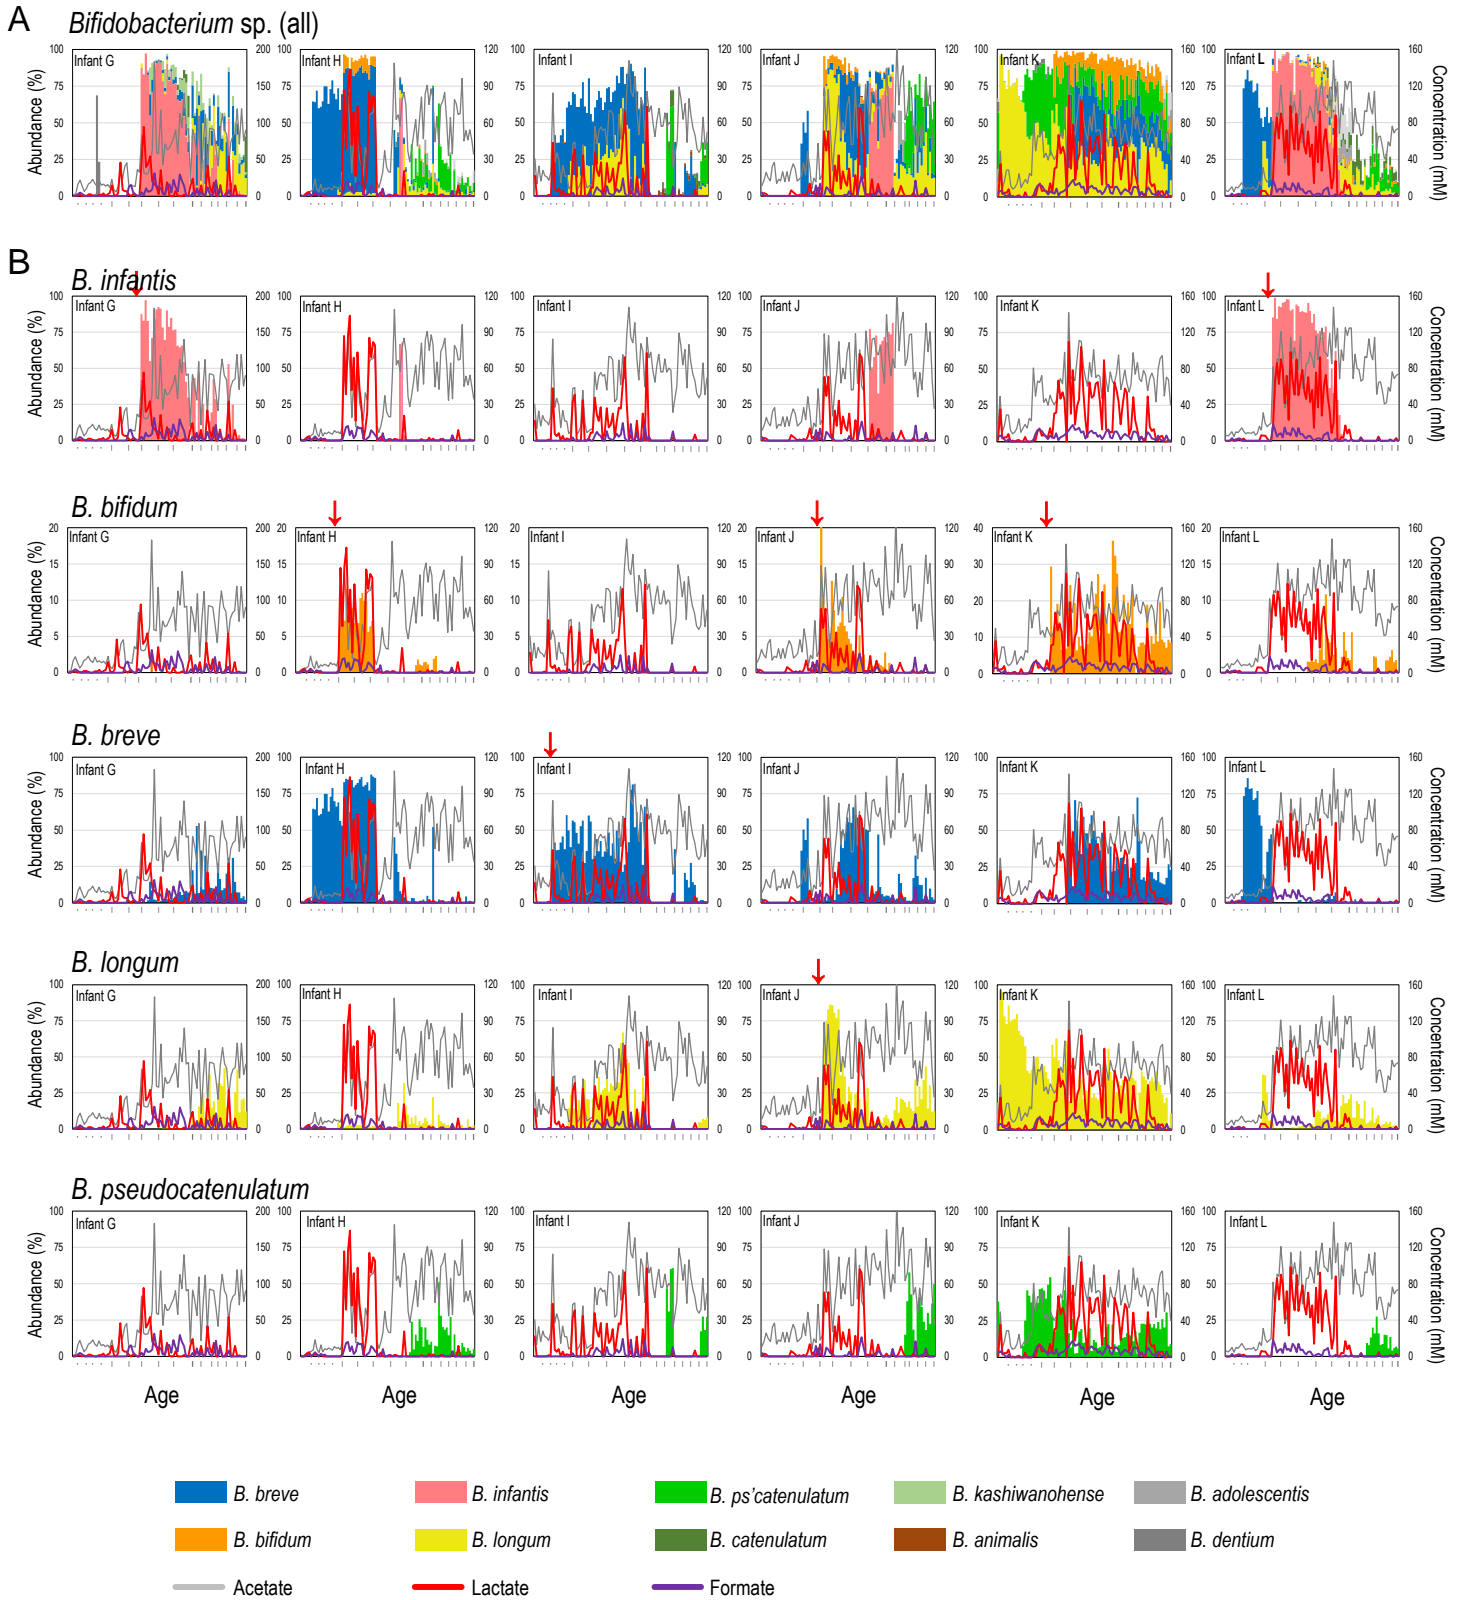

**Fig. S7 (Subjects G to L). *Bifidobacterium* species abundance and SCFA concentrations with respect to age. (A) All bifidobacterial species. (B) Each bifidobacterial species. Red arrow above the graph represent the increase in SCFA concentration coupled with increased bifidobacterial species abundance. Vertical bars along the x-axis represent every two months. Dots along the x-axis indicate every week until one month.**

| SCFAs   | Subjects | Bifidobacteriales  |                   |                 |                  |                             |                       |                          |                   |                        |                   |                    |              |
|---------|----------|--------------------|-------------------|-----------------|------------------|-----------------------------|-----------------------|--------------------------|-------------------|------------------------|-------------------|--------------------|--------------|
|         |          | <i>B. infantis</i> | <i>B. bifidum</i> | <i>B. breve</i> | <i>B. longum</i> | <i>B. pseudocatenulatum</i> | <i>B. catenulatum</i> | <i>B. kashiwanohense</i> | <i>B. dentium</i> | <i>B. adolescentis</i> | <i>B. faecale</i> | <i>B. animalis</i> |              |
| Lactate | A        | <u>0.42</u>        | NA                | 0.16            | <u>0.39</u>      | 0.14                        | NA                    | NA                       | -0.12             | -0.07                  | NA                | NA                 | NA           |
|         | B        | <u>0.53</u>        | NA                | -0.18           | <u>0.41</u>      | 0.18                        | <u>-0.35</u>          | <u>0.44</u>              | <u>0.45</u>       | -0.03                  | NA                | -0.12              | NA           |
|         | C        | <u>0.74</u>        | <u>0.52</u>       | NA              | -0.28            | <u>-0.32</u>                | -0.29                 | NA                       | NA                | <u>-0.59</u>           | NA                | NA                 | NA           |
|         | D        | <u>0.31</u>        | -0.13             | <u>0.34</u>     | 0.17             | <u>-0.42</u>                | -0.22                 | NA                       | NA                | -0.15                  | -0.03             | -0.10              | NA           |
|         | E        | 0.13               | 0.22              | 0.11            | -0.05            | <u>-0.34</u>                | -0.23                 | <u>-0.44</u>             | NA                | -0.25                  | <u>-0.47</u>      | <u>-0.64</u>       | -0.14        |
|         | F        | <u>0.70</u>        | <u>0.77</u>       | 0.05            | <u>-0.30</u>     | <u>-0.38</u>                | <u>-0.50</u>          | -0.22                    | <u>-0.42</u>      | 0.00                   | -0.22             | -0.22              | <u>-0.41</u> |
|         | G        | 0.27               | 0.22              | 0.10            | 0.08             | -0.01                       | -0.23                 | <u>-0.36</u>             | 0.06              | -0.16                  | NA                | NA                 | NA           |
|         | H        | <u>0.51</u>        | -0.22             | <u>0.58</u>     | <u>0.48</u>      | 0.04                        | <u>-0.36</u>          | NA                       | NA                | -0.09                  | -0.27             | -0.26              | -0.12        |
|         | I        | <u>0.52</u>        | NA                | -0.09           | <u>0.44</u>      | <u>0.49</u>                 | -0.19                 | -0.26                    | NA                | -0.29                  | NA                | NA                 | <u>-0.37</u> |
|         | J        | 0.40               | -0.08             | <u>0.53</u>     | <u>0.35</u>      | <u>0.32</u>                 | <u>-0.41</u>          | NA                       | NA                | -0.15                  | 0.00              | NA                 | 0.19         |
|         | K        | <u>0.68</u>        | NA                | <u>0.60</u>     | <u>0.53</u>      | <u>-0.34</u>                | -0.05                 | -0.04                    | NA                | -0.10                  | <u>-0.36</u>      | <u>-0.40</u>       | 0.01         |
|         | L        | <u>0.73</u>        | <u>0.86</u>       | 0.12            | 0.17             | 0.05                        | <u>-0.43</u>          | <u>-0.30</u>             | -0.11             | NA                     | -0.26             | -0.26              | NA           |
| Formate | A        | -0.09              | NA                | -0.04           | 0.02             | -0.15                       | NA                    | NA                       | -0.04             | 0.08                   | NA                | NA                 | NA           |
|         | B        | <u>0.67</u>        | NA                | 0.03            | <u>0.64</u>      | <u>0.49</u>                 | <u>-0.53</u>          | <u>0.70</u>              | <u>0.70</u>       | 0.02                   | NA                | 0.03               | NA           |
|         | C        | <u>0.50</u>        | <u>0.73</u>       | NA              | <u>-0.50</u>     | <u>-0.44</u>                | <u>-0.50</u>          | NA                       | NA                | -0.29                  | NA                | NA                 | NA           |
|         | D        | <u>0.62</u>        | -0.06             | 0.32            | <u>0.47</u>      | -0.25                       | 0.25                  | NA                       | NA                | 0.01                   | 0.17              | 0.08               | NA           |
|         | E        | <u>0.59</u>        | <u>0.49</u>       | <u>0.53</u>     | <u>0.45</u>      | 0.12                        | 0.23                  | -0.17                    | NA                | -0.11                  | -0.17             | -0.17              | -0.06        |
|         | F        | <u>0.78</u>        | <u>0.68</u>       | <u>0.34</u>     | 0.03             | -0.06                       | <u>-0.34</u>          | -0.05                    | -0.29             | -0.08                  | -0.09             | -0.09              | -0.28        |
|         | G        | <u>0.61</u>        | <u>0.54</u>       | 0.26            | 0.26             | 0.12                        | 0.12                  | 0.11                     | <u>0.38</u>       | -0.21                  | NA                | NA                 | NA           |
|         | H        | <u>0.43</u>        | -0.26             | <u>0.47</u>     | <u>0.44</u>      | -0.14                       | <u>-0.43</u>          | NA                       | NA                | -0.20                  | <u>-0.37</u>      | -0.24              | 0.07         |
|         | I        | <u>0.57</u>        | NA                | -0.06           | <u>0.32</u>      | <u>0.53</u>                 | -0.13                 | -0.11                    | NA                | -0.19                  | NA                | NA                 | -0.25        |
|         | J        | <u>0.31</u>        | 0.01              | <u>0.31</u>     | 0.25             | 0.24                        | -0.12                 | NA                       | NA                | -0.09                  | -0.17             | NA                 | 0.25         |
|         | K        | <u>0.69</u>        | NA                | <u>0.39</u>     | <u>0.44</u>      | <u>-0.33</u>                | 0.10                  | -0.12                    | NA                | 0.07                   | -0.29             | <u>-0.37</u>       | 0.09         |
|         | L        | <u>0.62</u>        | <u>0.75</u>       | -0.09           | -0.08            | -0.16                       | -0.27                 | <u>-0.32</u>             | -0.09             | NA                     | <u>-0.36</u>      | <u>-0.34</u>       | NA           |

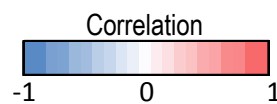

**Fig. S8. Heatmap visualisation of within-individual Spearman’s correlations between *Bifidobacterium* species and lactate and formate concentrations. FDR-corrected  $p$  values  $< 0.01$  are underlined.**

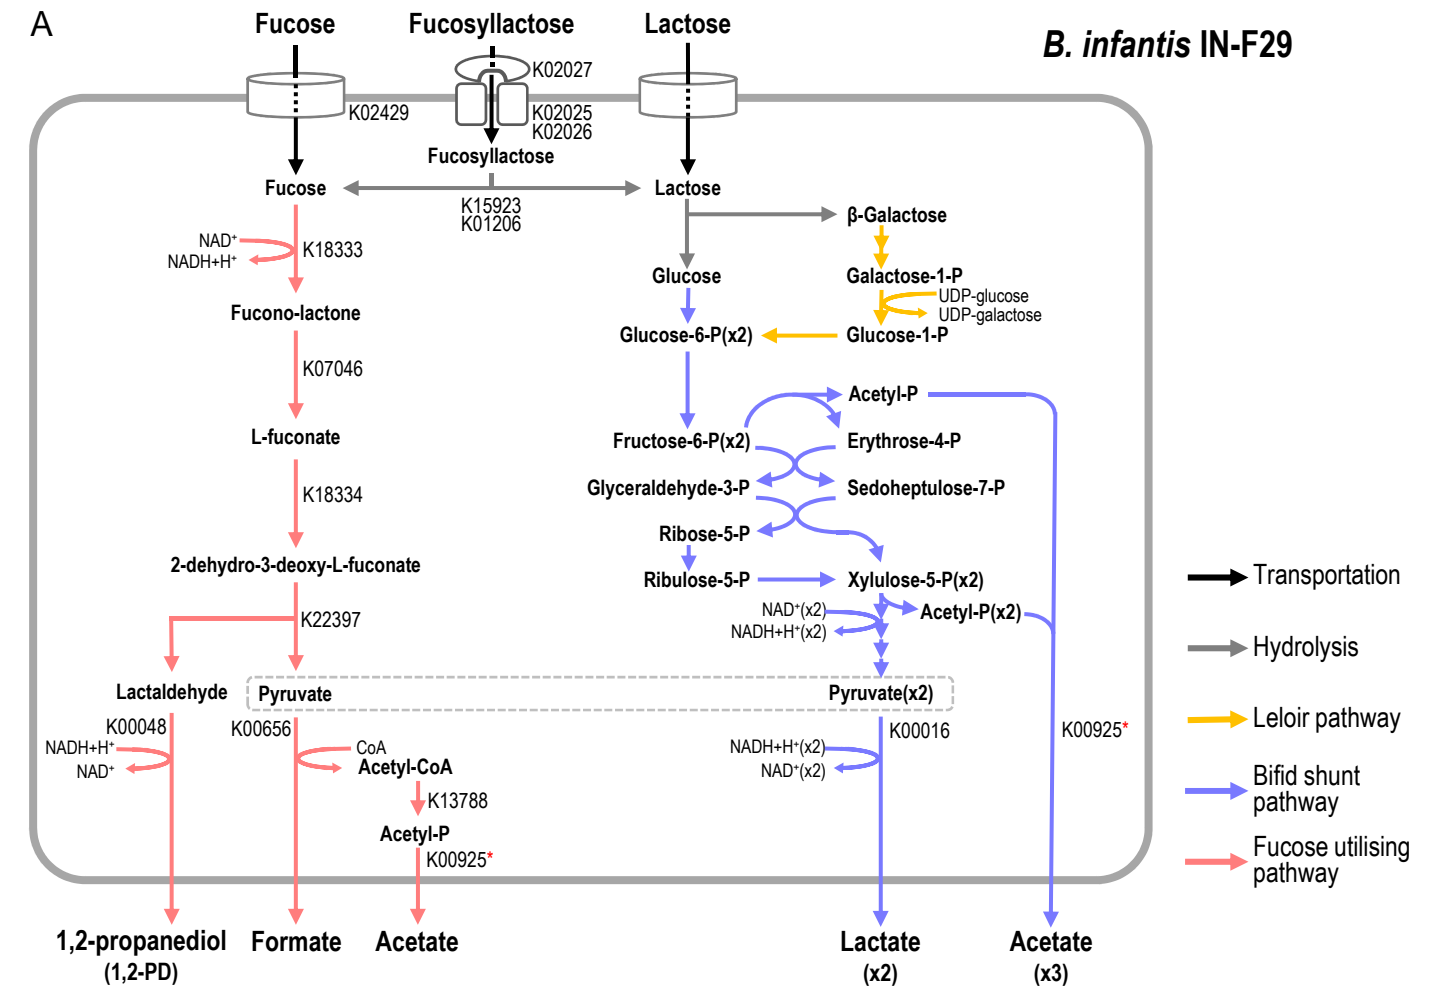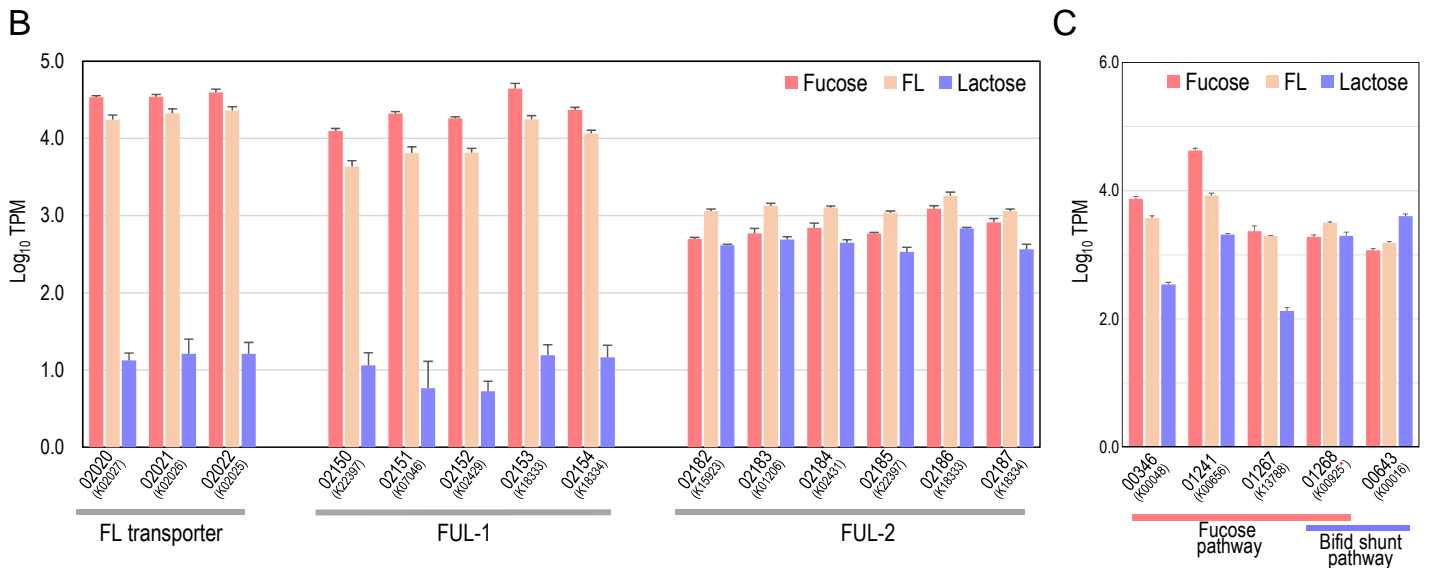

**Fig. S9. Bifidobacterial metabolic pathways to produce formate and its substrate.** (A) Schematic representation of the pathway for the utilisation of fucosyllactose, lactose, and fucose in *B. infantis*. (B) RNA expression profile during utilisation of fucose, FL, and lactose in *B. infantis* strain IN-F29. Expression of the genes located in ABC transporter for FL, FUL-1, and FUL-2 are shown. Number represent locus tags (INF29\_xxxxx are abbreviated). (C) Expression of genes involved in SCFAs and 1,2-PD production during growth in fucose, FL, and lactose. Only the genes in the final step were focused. \*Proteins annotated as K00925 are included in both fucose metabolising pathway and Bifid shunt pathway.

A

| Strain                                            | Accession no.   | Number of genes                  |        |        |                          |        |                    |        | Utilisation        |                   |        |      |
|---------------------------------------------------|-----------------|----------------------------------|--------|--------|--------------------------|--------|--------------------|--------|--------------------|-------------------|--------|------|
|                                                   |                 | Fucose → pyruvate + lactaldehyde |        |        | Fucosidase (GH95) (GH29) |        | Fucose transporter | FL-SBP | Formate production | 1,2-PD production | Fucose | Z-FL |
|                                                   |                 | K18333                           | K07046 | K18334 | K22397                   | K15923 | K01206             | K02429 | K00656             | K00048            |        |      |
| <i>B. infantis</i> JCM1222 <sup>1</sup>           | GCF_00020425.1  |                                  |        |        |                          |        |                    |        |                    |                   | +      | +    |
| <i>B. infantis</i> IN-07                          | GCF_001686105.1 |                                  |        |        |                          |        |                    |        |                    |                   | +      | +    |
| <i>B. infantis</i> IN-F29                         | GCF_001686125.1 |                                  |        |        |                          |        |                    |        |                    |                   | +      | +    |
| <i>B. infantis</i> IN-Cw019                       | This study      |                                  |        |        |                          |        |                    |        |                    |                   | +      | +    |
| <i>B. infantis</i> IN-Ew035                       | This study      |                                  |        |        |                          |        |                    |        |                    |                   | +      | +    |
| <i>B. infantis</i> IN-Jw022                       | This study      |                                  |        |        |                          |        |                    |        |                    |                   | +      | +    |
| <i>B. infantis</i> IN-Lw033                       | This study      |                                  |        |        |                          |        |                    |        |                    |                   | +      | +    |
| <i>B. breve</i> JCM1192 <sup>1</sup>              | GCA_001025175.1 |                                  |        |        |                          |        |                    |        |                    |                   | +      | -    |
| <i>B. breve</i> BR-06                             | GCF_001685705.1 |                                  |        |        |                          |        |                    |        |                    |                   | +      | -    |
| <i>B. breve</i> BR-07                             | GCF_001685725.1 |                                  |        |        |                          |        |                    |        |                    |                   | +      | -    |
| <i>B. breve</i> BR-10                             | GCF_001685745.1 |                                  |        |        |                          |        |                    |        |                    |                   | +      | +    |
| <i>B. breve</i> BR-14                             | GCF_001685765.1 |                                  |        |        |                          |        |                    |        |                    |                   | +      | +    |
| <i>B. breve</i> BR-15                             | GCF_001685785.1 |                                  |        |        |                          |        |                    |        |                    |                   | +      | +    |
| <i>B. breve</i> BR-19                             | GCF_001685805.1 |                                  |        |        |                          |        |                    |        |                    |                   | +      | -    |
| <i>B. breve</i> BR-20                             | GCF_001685825.1 |                                  |        |        |                          |        |                    |        |                    |                   | +      | +    |
| <i>B. breve</i> BR-21                             | GCF_001685845.1 |                                  |        |        |                          |        |                    |        |                    |                   | +      | +    |
| <i>B. breve</i> BR-A29                            | GCF_001685865.1 |                                  |        |        |                          |        |                    |        |                    |                   | +      | +    |
| <i>B. breve</i> BR-C29                            | GCF_001685885.1 |                                  |        |        |                          |        |                    |        |                    |                   | +      | -    |
| <i>B. breve</i> BR-H29                            | GCF_001685905.1 |                                  |        |        |                          |        |                    |        |                    |                   | +      | -    |
| <i>B. breve</i> BR-I29                            | GCF_001685925.1 |                                  |        |        |                          |        |                    |        |                    |                   | +      | +    |
| <i>B. breve</i> BR-L29                            | GCF_001685945.1 |                                  |        |        |                          |        |                    |        |                    |                   | +      | -    |
| <i>B. pseudocatenulatum</i> DSM20438 <sup>1</sup> | GCF_001025215.1 |                                  |        |        |                          |        |                    |        |                    |                   | -      | +    |
| <i>B. pseudocatenulatum</i> CA-05                 | GCF_001685965.1 |                                  |        |        |                          |        |                    |        |                    |                   | -      | -    |
| <i>B. pseudocatenulatum</i> CA-B29                | GCF_001685985.1 |                                  |        |        |                          |        |                    |        |                    |                   | -      | -    |
| <i>B. pseudocatenulatum</i> CA-C29                | GCF_001686005.1 |                                  |        |        |                          |        |                    |        |                    |                   | -      | +    |
| <i>B. pseudocatenulatum</i> CA-D29                | GCF_001686025.1 |                                  |        |        |                          |        |                    |        |                    |                   | -      | -    |
| <i>B. pseudocatenulatum</i> CA-K29a               | GCF_001686045.1 |                                  |        |        |                          |        |                    |        |                    |                   | -      | +    |
| <i>B. longum</i> JCM 1217 <sup>1</sup>            | GCF_000196555.1 |                                  |        |        |                          |        |                    |        |                    |                   | -      | -    |
| <i>B. longum</i> LO-06                            | GCF_001686145.1 |                                  |        |        |                          |        |                    |        |                    |                   | -      | -    |
| <i>B. longum</i> LO-10                            | GCF_001686165.1 |                                  |        |        |                          |        |                    |        |                    |                   | -      | -    |
| <i>B. longum</i> LO-21                            | GCF_001686185.1 |                                  |        |        |                          |        |                    |        |                    |                   | -      | -    |
| <i>B. longum</i> LO-C29                           | GCF_001686205.1 |                                  |        |        |                          |        |                    |        |                    |                   | -      | -    |
| <i>B. longum</i> LO-K29a                          | GCF_001686225.1 |                                  |        |        |                          |        |                    |        |                    |                   | -      | -    |
| <i>B. longum</i> LO-K29b                          | GCF_001686245.1 |                                  |        |        |                          |        |                    |        |                    |                   | -      | -    |
| <i>B. bifidum</i> ATCC 29521 <sup>1</sup>         | GCA_001025135.1 |                                  |        |        |                          |        |                    |        |                    |                   | -      | +    |
| <i>B. bifidum</i> BI-14                           | GCA_001685685.1 |                                  |        |        |                          |        |                    |        |                    |                   | -      | +    |
| <i>B. bifidum</i> BI-28                           | This study      |                                  |        |        |                          |        |                    |        |                    |                   | -      | +    |
| <i>B. adolescentis</i> ATCC 15703 <sup>1</sup>    | GCA_000010425.1 |                                  |        |        |                          |        |                    |        |                    |                   | -      | -    |
| <i>B. catenulatum</i> JCM 1194 <sup>1</sup>       | GCF_001025205.1 |                                  |        |        |                          |        |                    |        |                    |                   | -      | -    |
| <i>B. kashiwanohense</i> JCM 15439 <sup>1</sup>   | GCF_001042615.1 |                                  |        |        |                          |        |                    |        |                    |                   | -      | +    |

No. of gene 0 1 2 3

B

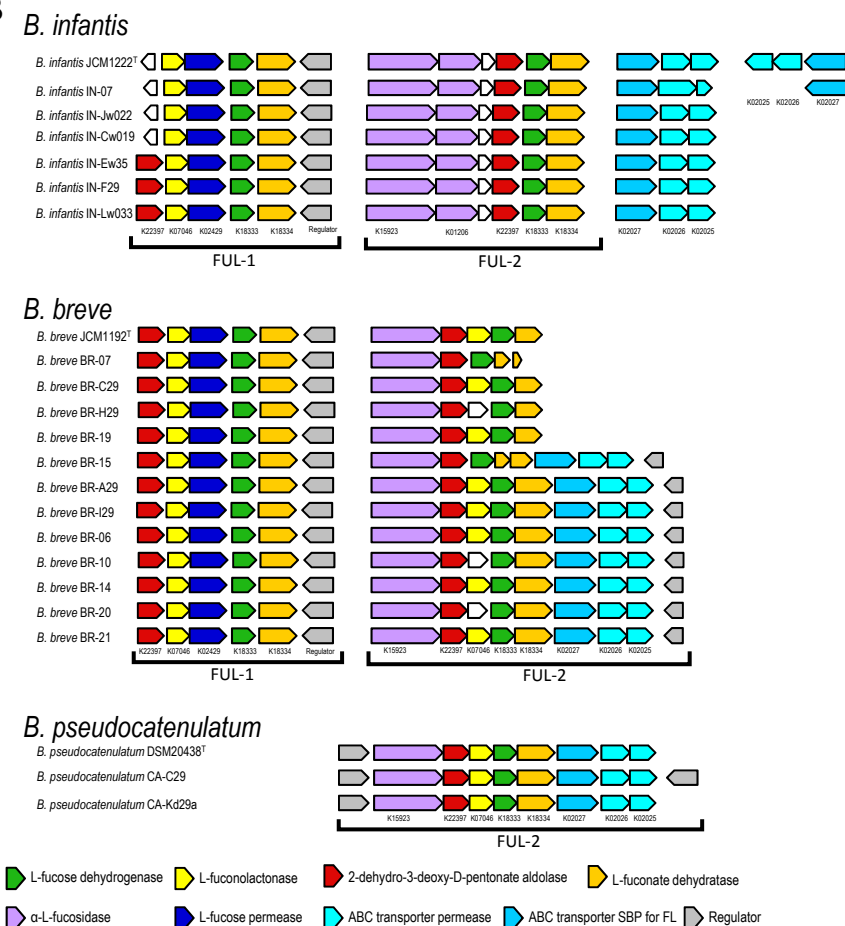

C

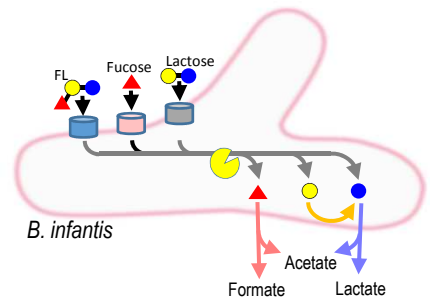

D

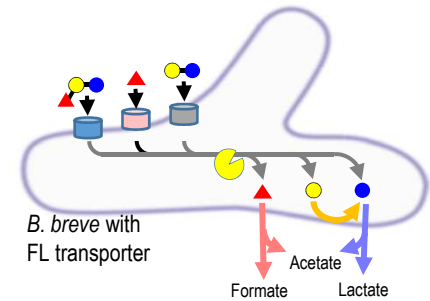

E

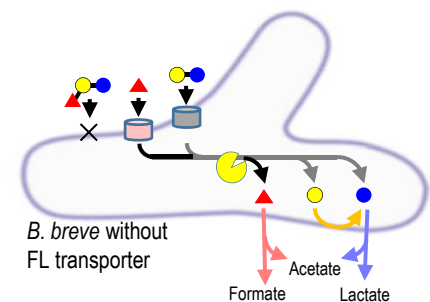

F

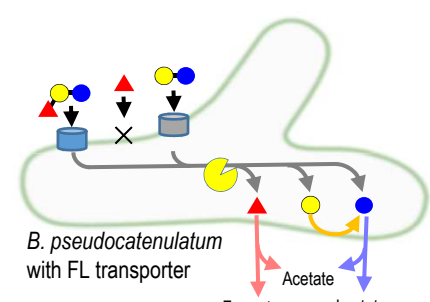

G

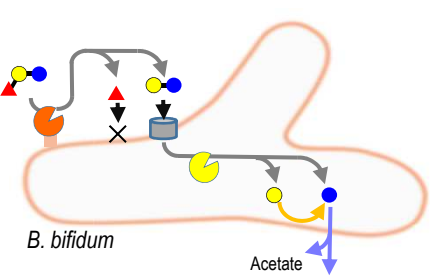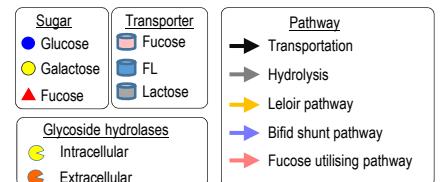

**Fig. S10. Genes and loci involved in fucose and fucosylated HMO utilisation and their variation among bifidobacterial species.** (A) Distribution of fucose-metabolizing genes in representative human gut bifidobacteria. The number of categorized genes is presented. Functional assignment was based on BlastKOALA, except for ABC transporter SBP for FL (FL-SBP), which was annotated using BLASTn with a reference sequence (LC068768). \*, fucosidase of *B. bifidum* was predicted to be extracellular, whereas that of the other bifidobacteria were predicted as intracellular. (B) Gene conservation and organisation. Strains without the loci are not shown. (C-G) Utilisation of fucosyllactose by infant bifidobacteria. (C, D) *B. infantis* and *B. breve* with FL-SBP utilise fucose and FL. (E) *B. breve* without FL-SBP utilise fucose but not FL. (F) *B. pseudocatenulatum* with FL-SBP utilise FL but not extracellular fucose. (G) *B. bifidum* that possess extracellular fucosidase digest FL into fucose and lactose extracellularly. The species uptake and utilise the resultant lactose but not fucose.

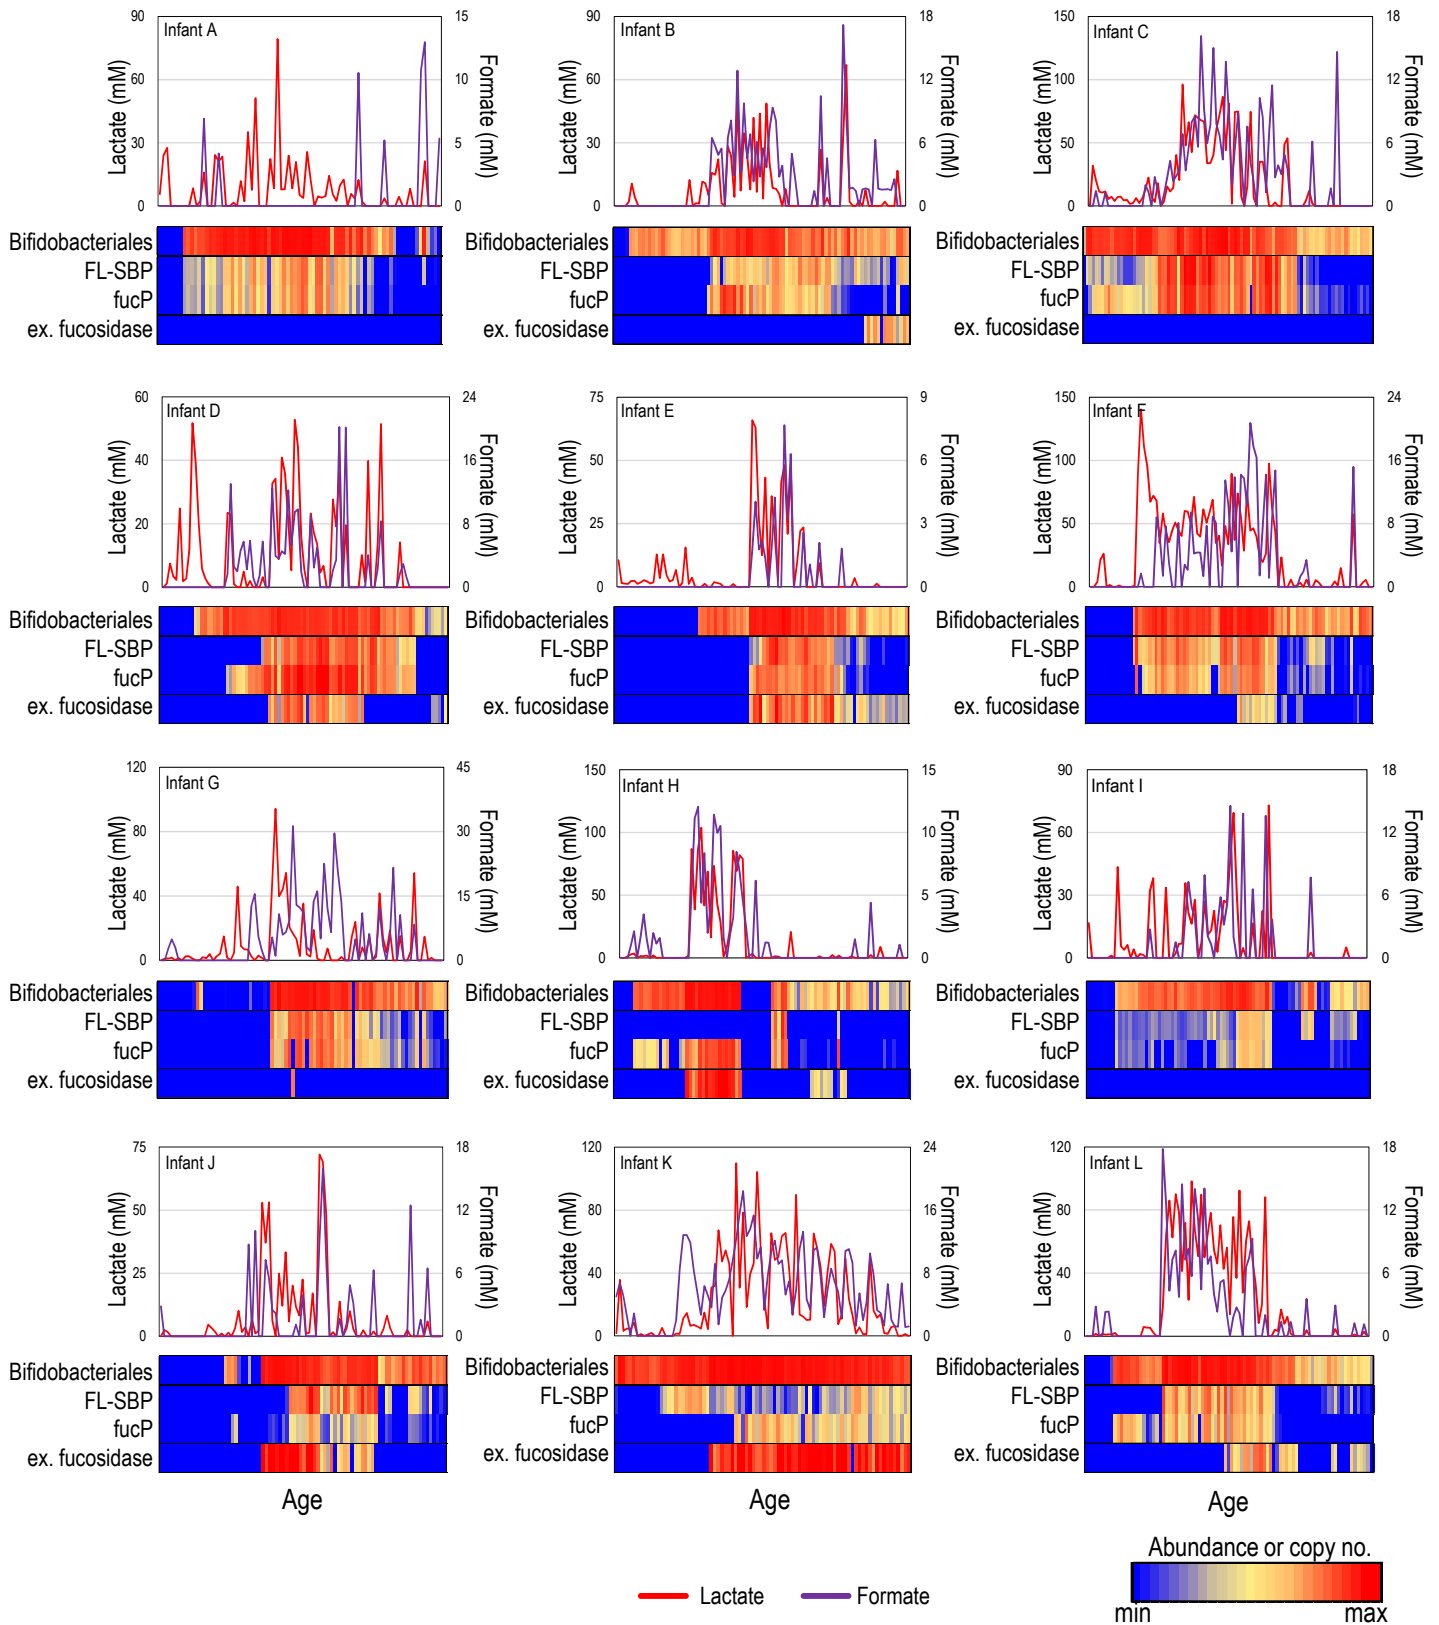

**Fig. S11. Relationship between key marker genes for fucosyl HMO utilisation and concentration of lactate and formate.** The concentration of lactate and formate are shown in the line graph, whereas the abundance of Bifidobacteriales and the presence of the key marker genes are visualised in heatmap. Color scale of Bifidobacteriales ranged from 0 to 100%, FL-SBP and fucose symporter (fucP) ranged from  $10^9$  to  $10^{11}$  copies per g of feces (log scale), and extracellular fucosidase (denoted as ex. fucosidase) ranged from  $10^8$  to  $10^{10}$  copies per g of feces (log scale).

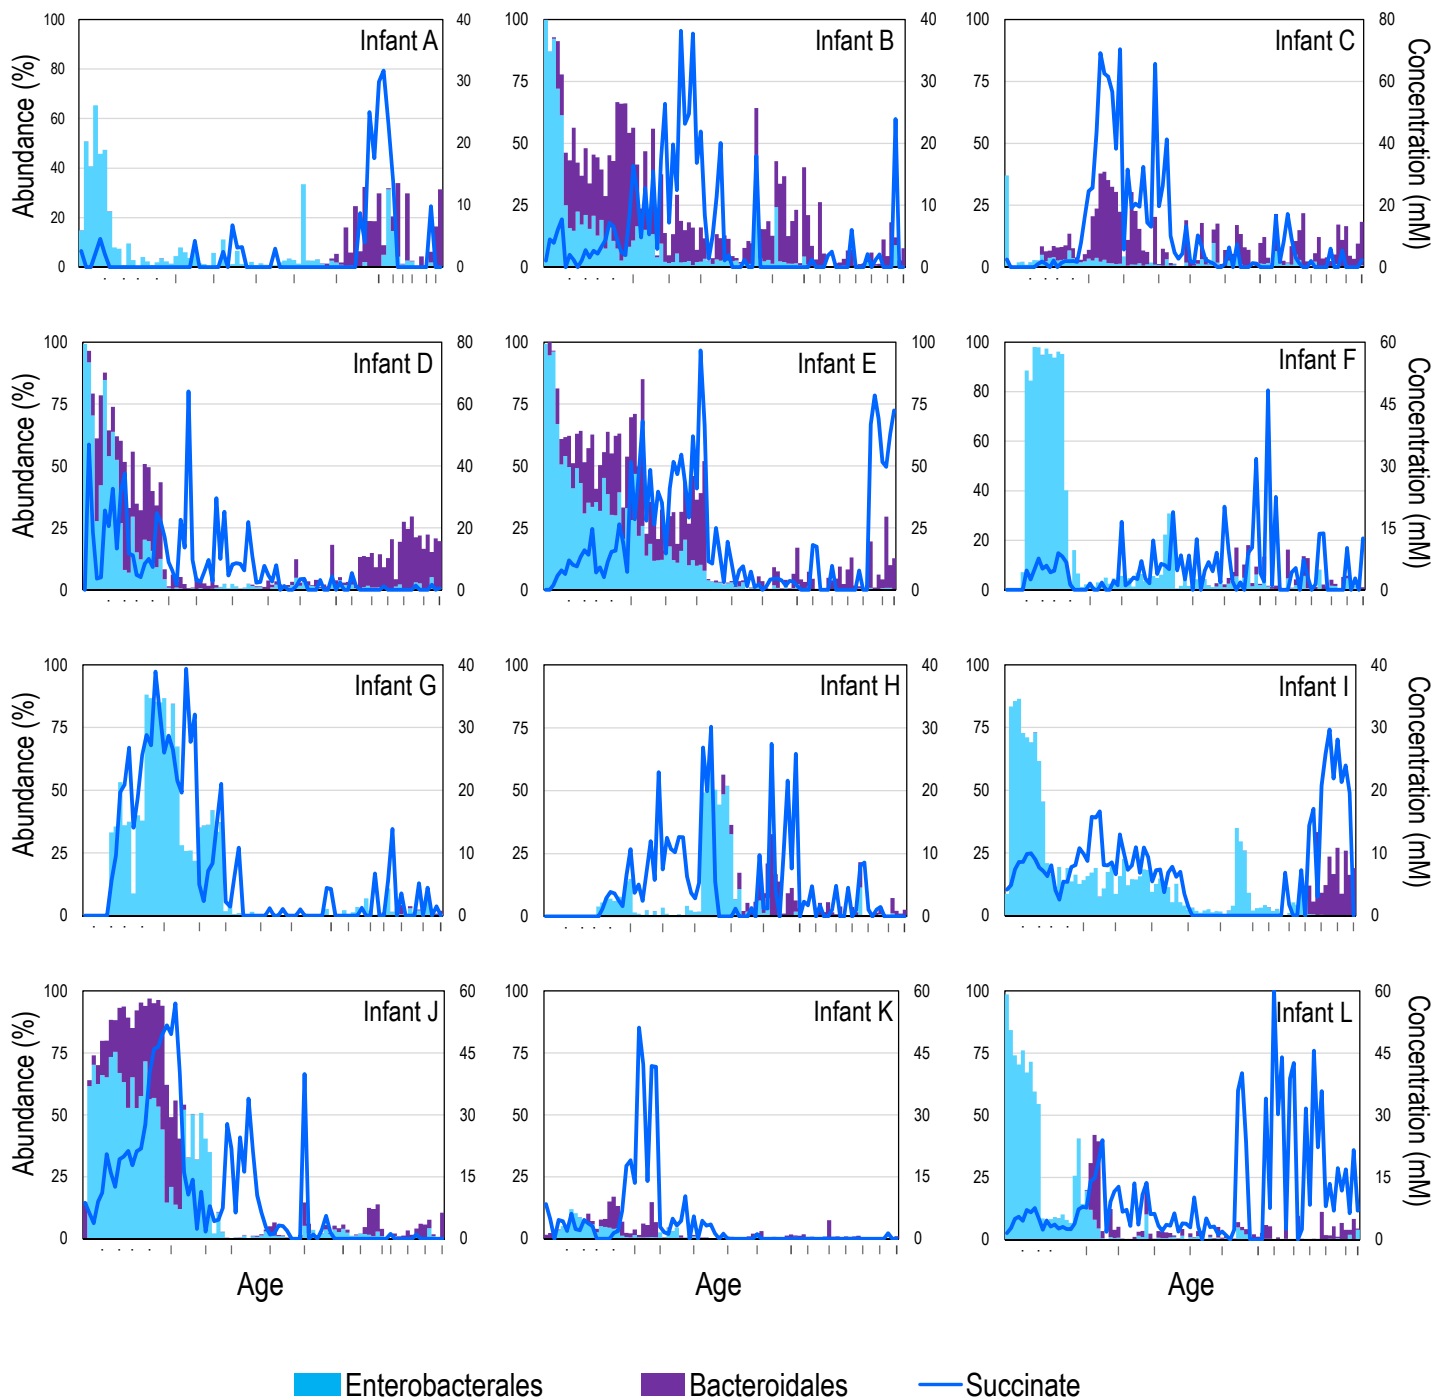

**Fig. S12. Relationship between gut succinate concentration and the abundance of Enterobacteriales and Bacteroidetes with respect to age.** See Supplementary text for Succinate-Bacteroidales relationship. Vertical bars along the x-axis represent every two months. Dots along the x-axis indicate every week until one month.

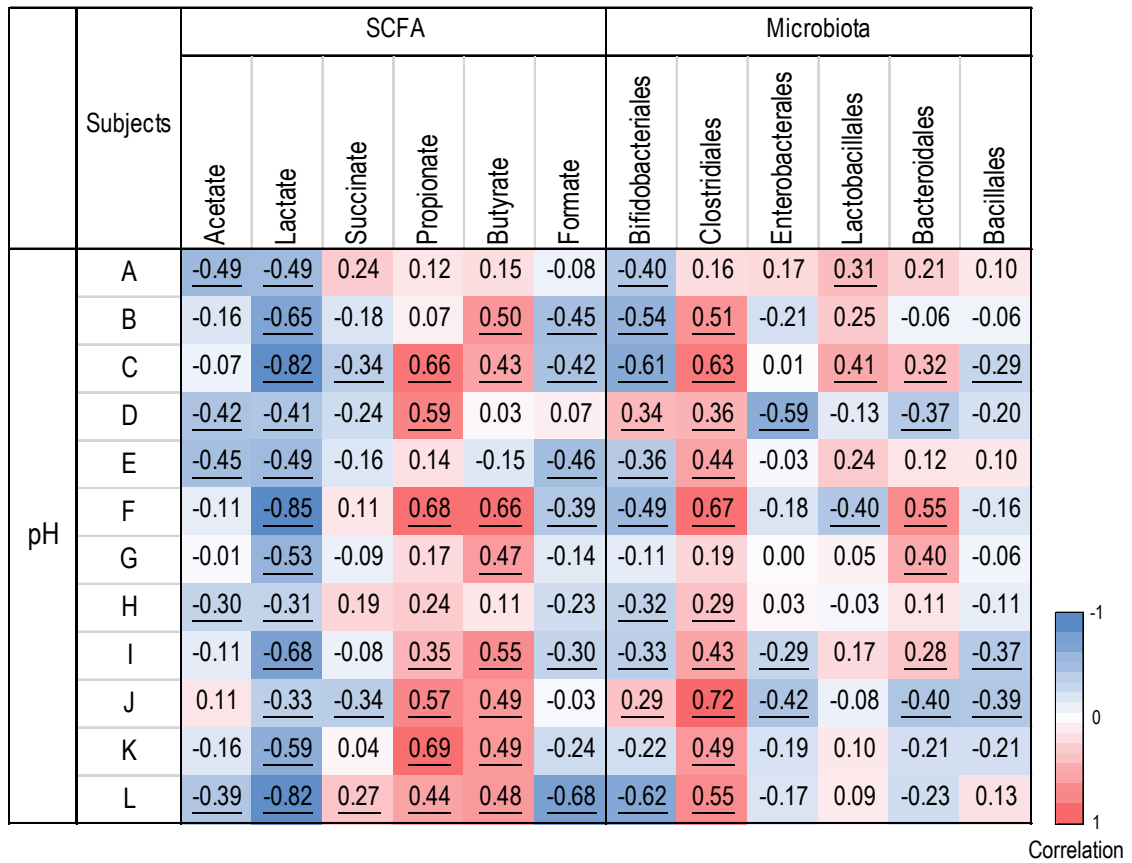

**Fig. S13. Heatmap visualisation of within-subject correlation between gut pH-SCFA and pH-microbiota.** Numbers represent  $r$  values (Spearman's correlation). FDR-corrected  $p$  values  $< 0.01$  are underlined.

Table S1. Relevant characteristics of infants, whose gut microbiota were investigated during the first two years of life\*

| Subject ID | Delivery | Birth weight (g) | Sex | Gestation (week) | Initiation of solid food (month) | Cessation of breast-feeding (month) | Antibiotic exposure (week)   | First probiotic exposure (week) |              | Number of samples | Age of parents |        | Furry pet exposure (month) | Number of sibling |
|------------|----------|------------------|-----|------------------|----------------------------------|-------------------------------------|------------------------------|---------------------------------|--------------|-------------------|----------------|--------|----------------------------|-------------------|
|            |          |                  |     |                  |                                  |                                     |                              | Bifidobacteria                  | Other genera |                   | Father         | Mother |                            |                   |
| A          | Vaginal  | 2,820            | M   | 40               | 5.4                              | 10.9                                | 84, 98                       | Not recorded                    | Not recorded | 77                | 42             | 41     | Not exposed                | 0                 |
| B          | Vaginal  | 3,030            | F   | 40               | 5.8                              | 12.7                                | 25, 40, 44, 45<br>49, 84, 86 | Not recorded                    | 54           | 91                | 43             | 42     | 0-24                       | 1                 |
| C          | Vaginal  | 2,620            | M   | 39               | 5.5                              | 13.3                                | Not exposed                  | 56                              | 56           | 92                | 29             | n.t.   | Not exposed                | 0                 |
| D          | Vaginal  | 2,750            | F   | 38               | 6.3                              | 20.4                                | Not exposed                  | 58                              | 40           | 90                | 36             | 33     | Not exposed                | 1                 |
| E          | Vaginal  | 2,544            | F   | 40               | 5.2                              | 18.8                                | Not exposed                  | 46                              | 64           | 91                | 33             | 31     | Not exposed                | 0                 |
| F          | Vaginal  | 2,706            | M   | 38               | 5.2                              | 11.0                                | 74, 98                       | 37                              | 30           | 91                | 31             | 29     | Not exposed                | 0                 |
| G          | Vaginal  | 2,525            | M   | 38               | 6.1                              | 13.5                                | 5, 29-31,<br>46-54, 88       | 17                              | 19           | 82                | 33             | n.t.   | Not exposed                | 0                 |
| H          | Vaginal  | 2,935            | M   | 38               | 5.2                              | 9.6                                 | 37, 45, 96-98                | 54                              | 43           | 90                | 29             | 30     | 0-9                        | 1                 |
| I          | Vaginal  | 2,926            | M   | 40               | 6.0                              | 10.4                                | 66, 70                       | 44                              | 17           | 87                | 31             | 30     | Not exposed                | 0                 |
| J          | Vaginal  | 3,178            | F   | 38               | 5.3                              | 13.6                                | 58                           | 62                              | 62           | 84                | 31             | 31     | Not exposed                | 1                 |
| K          | Vaginal  | 3,092            | F   | 38               | 4.9                              | 24.0                                | 70                           | Not recorded                    | Not recorded | 84                | 34             | 34     | Not exposed                | 0                 |
| L          | Vaginal  | 2,960            | M   | 39               | 5.5                              | 10.8                                | Not exposed                  | 47                              | 45           | 89                | 35             | 33     | Not exposed                | 1                 |

\* Infant A and B are sibling. Infant E and L are sibling.



Table S2. Utilisation of HMO-derived carbohydrate and the accumulation of SCFA, fucose and 1,2-PD

| Species                               | Substrate Supplied (%) | Growth            | Remaining suger in culture supernatant(%) |        |       | Metabolite (mM) |         |          |        |
|---------------------------------------|------------------------|-------------------|-------------------------------------------|--------|-------|-----------------|---------|----------|--------|
|                                       |                        | OD <sub>600</sub> | Lactose                                   | Fucose | 2'-FL | Acetate         | Lactate | Formate* | 1,2-PD |
| <i>B. infantis</i>                    | Lactose (0.5%)         | 1.0               | 0.0                                       | 0.0    | 0.0   | 41.5            | 22.2    | 2.7      | 0.0    |
|                                       | Fucose (1%)            | 0.3               | 0.0                                       | 0.5    | 0.0   | 17.0            | 1.7     | 17.8     | 27.0   |
|                                       | 2'-FL (0.5%)           | 0.4               | 0.0                                       | 0.0    | 0.0   | 38.9            | 15.4    | 11.6     | 7.8    |
| <i>B. breve</i>                       | Lactose (0.5%)         | 1.1               | 0.0                                       | 0.0    | 0.0   | 40.5            | 23.3    | 1.2      | 0.0    |
|                                       | Fucose (1%)            | 0.1               | 0.0                                       | 0.3    | 0.0   | 21.9            | 1.6     | 22.5     | 41.0   |
|                                       | 2'-FL (0.5%)           | 0.0               | 0.0                                       | 0.0    | 0.6   | 2.2             | 0.1     | 0.2      | 0.0    |
| <i>B. bifidum</i>                     | Lactose (0.5%)         | 0.5               | 0.0                                       | 0.0    | 0.0   | 40.6            | 22.3    | 2.9      | 0.0    |
|                                       | Fucose (1%)            | 0.0               | 0.0                                       | 1.1    | 0.0   | 0.2             | 0.2     | 0.0      | 0.0    |
|                                       | 2'-FL (0.5%)           | 1.1               | 0                                         | 0.2    | 0     | 37              | 19      | 2        | 0      |
| <i>B. breve</i> and <i>B. bifidum</i> | Lactose (0.5%)         | 0.3               | 0.0                                       | 0.0    | 0.0   | 42.3            | 22.4    | 3.2      | 0.0    |
|                                       | Fucose (1%)            | 0.0               | 0.0                                       | 0.9    | 0.0   | 2.7             | 0.4     | 2.6      | 6.0    |
|                                       | 2'-FL (0.5%)           | 0.5               | 0.0                                       | 0.1    | 0.0   | 41.9            | 7.3     | 15.1     | 5.9    |

\* Formate production by these bifidobacteria is visualised in Fig. 6B.

Table S3. Specific PCR primers used in this study

| Target                                                            | Primer                                 | Sequence                                                   | Size (bp) | Tm   | References             |
|-------------------------------------------------------------------|----------------------------------------|------------------------------------------------------------|-----------|------|------------------------|
| <i>B. longum</i> ss. <i>infantis</i><br>(specific co-transporter) | Binf1-F                                | AGCAGCAGAAGTCCAGTGAAG                                      | 156       | 64°C | This study             |
|                                                                   | Binf1-R                                | AGTAGTGGATGGTCGGCATAAC                                     |           |      |                        |
| <i>B. longum</i> ss. <i>longum</i><br>(16S)                       | s-Blon182-F                            | TTCCAGTTGATCGCATGGTC                                       | 831       | 55°C | Matsuki et. al<br>2004 |
|                                                                   | s-Blon1008-R                           | GGGAAGCCGTATCTCTACGA                                       |           |      |                        |
| ABC transporter<br>SBP for FL                                     | Bif_flsbp271-F<br>Bif_flsbp754-R       | GAYCATTTACSAARTTCCAGAAYGTYG<br>YGGRAKATAMTCCCAATCSGTRTTSAC | 510       | 58°C | This study             |
| Fucose permease                                                   | Bif_fucP895-F                          | CGMTTCGYCACCACCC                                           | 386       | 55°C | This study             |
|                                                                   | Bif_fucP1264-R                         | GCCTCCTTCAGACCGAT                                          |           |      |                        |
| Extracelullar<br>fucosidase (GH29)                                | sBbif_GH29_3579-F<br>sBbif_GH29_3784-R | CGACGGCAACAATAACGG<br>GGCAGCAACTCGACATTCAT                 | 227       | 55°C | This study             |

Supplementary Data 1. Information regarding sample backgrounds (subjects, age, feeding, and exposure to antibiotics and probiotics), 16S rRNA gene amplicon accession number, SCFA concentrations, and pH.

| Sample ID | Sub-jects | Age |       | Feeding (6 types) | Exposure    |            | SCFA    |         |           |            |          |         |             |             |          | pH  | 16S amplicon accession no. |
|-----------|-----------|-----|-------|-------------------|-------------|------------|---------|---------|-----------|------------|----------|---------|-------------|-------------|----------|-----|----------------------------|
|           |           | day | month |                   | Antibiotics | Probiotics | Acetate | Lactate | Succinate | Propionate | Butyrate | Formate | Isovalerate | Isobutyrate | Valerate |     |                            |
| Ad002     | A         | 2   | 0.07  | Mixed-milk        | no          | no         | 14.5    | 5.7     | 2.6       | 0.0        | 0.0      | 0.0     | 0.0         | 0.0         | 0.0      | 6.6 | SAMD00242836               |
| Ad003     | A         | 3   | 0.10  | Mixed-milk        | no          | no         | 33.1    | 24.0    | 0.0       | 0.0        | 0.0      | 0.0     | 0.0         | 0.0         | 0.0      | 5.4 | SAMD00242835               |
| Ad004     | A         | 4   | 0.13  | Mixed-milk        | no          | no         | 24.2    | 27.6    | 0.0       | 0.0        | 0.0      | 0.0     | 0.0         | 0.0         | 0.0      | 5.4 | SAMD00242837               |
| Ad005     | A         | 5   | 0.16  | Mixed-milk        | no          | no         | 140.4   | 0.0     | 2.2       | 0.0        | 0.0      | 0.0     | 0.0         | 0.0         | 0.0      | 5.3 | SAMD00242838               |
| Ad006     | A         | 6   | 0.20  | Mixed-milk        | no          | no         | 98.6    | 0.0     | 4.5       | 0.0        | 0.0      | 0.0     | 0.0         | 0.0         | 0.0      | 5.5 | SAMD00242839               |
| Ad007     | A         | 7   | 0.23  | Mixed-milk        | no          | no         | 93.7    | 0.0     | 2.1       | 0.0        | 0.0      | 0.0     | 0.0         | 0.0         | 0.0      | 5.5 | SAMD00242840               |
| Ad009     | A         | 9   | 0.30  | Mixed-milk        | no          | no         | 31.9    | 0.0     | 0.0       | 7.1        | 0.0      | 0.0     | 0.0         | 0.0         | 0.0      | 6.6 | SAMD00242841               |
| Ad011     | A         | 11  | 0.36  | Mixed-milk        | no          | no         | 103.7   | 0.0     | 0.0       | 2.1        | 0.0      | 0.0     | 0.0         | 0.0         | 0.0      | 5.2 | SAMD00242842               |
| Ad013     | A         | 13  | 0.43  | Mixed-milk        | no          | no         | 58.9    | 0.0     | 0.0       | 0.0        | 0.0      | 0.0     | 0.0         | 0.0         | 0.0      | 5.8 | SAMD00242843               |
| Ad015     | A         | 15  | 0.49  | Breast-milk       | no          | no         | 49.3    | 8.5     | 0.0       | 0.0        | 0.0      | 0.0     | 0.0         | 0.0         | 0.0      | 5.1 | SAMD00242844               |
| Ad017     | A         | 17  | 0.56  | Breast-milk       | no          | no         | 76.0    | 0.0     | 0.0       | 0.0        | 0.0      | 0.0     | 0.0         | 0.0         | 0.0      | 5.4 | SAMD00242845               |
| Ad019     | A         | 19  | 0.62  | Breast-milk       | no          | no         | 50.3    | 2.4     | 0.0       | 0.0        | 0.0      | 0.0     | 0.0         | 0.0         | 0.0      | 5.6 | SAMD00242846               |
| Ad021     | A         | 21  | 0.69  | Breast-milk       | no          | no         | 67.7    | 16.0    | 0.0       | 0.0        | 0.0      | 6.9     | 0.0         | 0.0         | 0.0      | 5.2 | SAMD00242847               |
| Ad023     | A         | 23  | 0.76  | Breast-milk       | no          | no         | 28.9    | 0.0     | 0.0       | 0.0        | 0.0      | 0.0     | 0.0         | 0.0         | 0.0      | 6.2 | SAMD00242848               |
| Ad025     | A         | 25  | 0.82  | Breast-milk       | no          | no         | 47.6    | 0.0     | 0.0       | 0.0        | 0.0      | 0.0     | 0.0         | 0.0         | 0.0      | 5.3 | SAMD00242849               |
| Ad027     | A         | 27  | 0.89  | Breast-milk       | no          | no         | 67.9    | 24.2    | 0.0       | 0.0        | 0.0      | 0.0     | 0.0         | 0.0         | 0.0      | 5.1 | SAMD00242850               |
| Ad029     | A         | 29  | 0.95  | Breast-milk       | no          | no         | 70.7    | 21.2    | 0.0       | 0.0        | 0.0      | 4.1     | 0.0         | 0.0         | 0.0      | 5.7 | SAMD00242851               |
| Aw005     | A         | 37  | 1.22  | Breast-milk       | no          | no         | 51.2    | 23.4    | 0.0       | 0.0        | 0.0      | 0.0     | 0.0         | 0.0         | 0.0      | 5.7 | SAMD00242852               |
| Aw006     | A         | 44  | 1.45  | Breast-milk       | no          | no         | 18.4    | 0.0     | 0.0       | 0.0        | 0.0      | 0.0     | 0.0         | 0.0         | 0.0      | 5.6 | SAMD00242853               |
| Aw007     | A         | 51  | 1.68  | Breast-milk       | no          | no         | 25.2    | 0.0     | 0.0       | 0.0        | 0.0      | 0.0     | 0.0         | 0.0         | 0.0      | 5.8 | SAMD00242854               |
| Aw008     | A         | 58  | 1.91  | Breast-milk       | no          | no         | 24.7    | 1.6     | 0.0       | 0.0        | 0.0      | 0.0     | 0.0         | 0.0         | 0.0      | 5.8 | SAMD00242855               |
| Aw009     | A         | 65  | 2.14  | Breast-milk       | no          | no         | 6.9     | 0.0     | 0.0       | 0.0        | 0.0      | 0.0     | 0.0         | 0.0         | 0.0      | 7.0 | SAMD00242856               |
| Aw010     | A         | 72  | 2.37  | Breast-milk       | no          | no         | 41.6    | 11.8    | 0.0       | 0.0        | 0.0      | 0.0     | 0.0         | 0.0         | 0.0      | 5.5 | SAMD00242857               |
| Aw011     | A         | 79  | 2.60  | Breast-milk       | no          | no         | 19.0    | 2.2     | 0.0       | 0.0        | 0.0      | 0.0     | 0.0         | 0.0         | 0.0      | 5.9 | SAMD00242858               |
| Aw012     | A         | 86  | 2.83  | Breast-milk       | no          | no         | 79.8    | 35.1    | 4.2       | 0.0        | 0.0      | 0.0     | 0.0         | 0.0         | 0.0      | 5.1 | SAMD00242859               |
| Aw013     | A         | 93  | 3.06  | Breast-milk       | no          | no         | 35.7    | 7.6     | 0.0       | 0.0        | 0.0      | 0.0     | 0.0         | 0.0         | 0.0      | 5.5 | SAMD00242860               |
| Aw014     | A         | 100 | 3.29  | Breast-milk       | no          | no         | 75.5    | 51.2    | 0.0       | 0.0        | 0.0      | 0.0     | 0.0         | 0.0         | 0.0      | 5.0 | SAMD00242861               |
| Aw016     | A         | 109 | 3.58  | Breast-milk       | no          | no         | 10.7    | 0.0     | 0.0       | 0.0        | 0.0      | 0.0     | 0.0         | 0.0         | 0.0      | 6.7 | SAMD00242862               |
| Aw017     | A         | 121 | 3.98  | Breast-milk       | no          | no         | 0.7     | 0.0     | 0.0       | 0.0        | 0.0      | 0.0     | 0.0         | 0.0         | 0.0      | 7.4 | SAMD00242863               |
| Aw018     | A         | 128 | 4.21  | Breast-milk       | no          | no         | 13.1    | 0.0     | 0.0       | 0.0        | 0.0      | 0.0     | 0.0         | 0.0         | 0.0      | 8.0 | SAMD00242864               |
| Aw019     | A         | 135 | 4.44  | Breast-milk       | no          | no         | 14.9    | 22.3    | 2.5       | 0.0        | 0.0      | 0.0     | 0.0         | 0.0         | 0.0      | 5.4 | SAMD00242865               |
| Aw020     | A         | 143 | 4.70  | Breast-milk       | no          | no         | 31.7    | 8.4     | 0.0       | 0.0        | 0.0      | 0.0     | 0.0         | 0.0         | 0.0      | 5.4 | SAMD00242866               |
| Aw021     | A         | 151 | 4.96  | Breast-milk       | no          | no         | 60.2    | 79.3    | 6.8       | 0.0        | 0.0      | 0.0     | 0.0         | 0.0         | 0.0      | 4.0 | SAMD00242867               |
| Aw022     | A         | 157 | 5.16  | Breast-milk       | no          | no         | 85.8    | 7.9     | 3.1       | 4.0        | 0.0      | 0.0     | 0.0         | 0.0         | 0.0      | 6.2 | SAMD00242868               |
| Aw023     | A         | 163 | 5.36  | Breast-milk       | no          | no         | 66.0    | 8.0     | 3.3       | 0.0        | 0.0      | 0.0     | 0.0         | 0.0         | 0.0      | 5.7 | SAMD00242869               |
| Aw024     | A         | 170 | 5.59  | milk & solid      | no          | no         | 131.2   | 23.9    | 0.0       | 0.0        | 0.0      | 0.0     | 0.0         | 0.0         | 0.0      | 4.7 | SAMD00242870               |
| Aw025     | A         | 178 | 5.85  | milk & solid      | no          | no         | 75.4    | 8.3     | 0.0       | 0.0        | 0.0      | 0.0     | 0.0         | 0.0         | 0.0      | 5.3 | SAMD00242871               |
| Aw026     | A         | 185 | 6.08  | milk & solid      | no          | no         | 113.3   | 20.9    | 0.0       | 8.8        | 0.0      | 0.0     | 0.0         | 0.0         | 0.0      | 4.9 | SAMD00242872               |
| Aw027     | A         | 190 | 6.25  | milk & solid      | no          | no         | 85.9    | 5.2     | 0.0       | 6.4        | 0.0      | 0.0     | 0.0         | 0.0         | 0.0      | 5.3 | SAMD00242873               |
| Aw028     | A         | 198 | 6.51  | milk & solid      | no          | no         | 82.4    | 3.8     | 0.0       | 3.0        | 0.0      | 0.0     | 0.0         | 0.0         | 0.0      | 4.1 | SAMD00242874               |
| Aw029     | A         | 205 | 6.74  | milk & solid      | no          | no         | 137.1   | 25.7    | 0.0       | 8.3        | 0.0      | 0.0     | 0.0         | 0.0         | 0.0      | 4.8 | SAMD00242875               |
| Aw030     | A         | 212 | 6.97  | milk & solid      | no          | no         | 54.5    | 12.2    | 3.0       | 6.1        | 0.0      | 0.0     | 0.0         | 0.0         | 0.0      | 5.3 | SAMD00242876               |
| Aw031     | A         | 219 | 7.20  | milk & solid      | no          | no         | 84.8    | 0.0     | 0.0       | 5.0        | 0.0      | 0.0     | 0.0         | 0.0         | 0.0      | 5.1 | SAMD00242877               |
| Aw032     | A         | 226 | 7.43  | milk & solid      | no          | no         | 117.6   | 4.6     | 0.0       | 9.3        | 0.0      | 0.0     | 0.0         | 0.0         | 0.0      | 4.9 | SAMD00242878               |
| Aw033     | A         | 233 | 7.66  | milk & solid      | no          | no         | 97.9    | 3.9     | 0.0       | 5.7        | 0.0      | 0.0     | 0.0         | 0.0         | 0.0      | 4.5 | SAMD00242879               |
| Aw034     | A         | 240 | 7.89  | milk & solid      | no          | no         | 93.1    | 4.7     | 0.0       | 4.8        | 0.0      | 0.0     | 0.0         | 0.0         | 0.0      | 5.6 | SAMD00242880               |
| Aw035     | A         | 249 | 8.19  | milk & solid      | no          | no         | 157.5   | 14.4    | 0.0       | 6.3        | 0.0      | 0.0     | 0.0         | 0.0         | 0.0      | 4.2 | SAMD00242881               |
| Aw036     | A         | 255 | 8.38  | milk & solid      | no          | no         | 62.3    | 5.7     | 0.0       | 14.1       | 0.0      | 0.0     | 0.0         | 0.0         | 0.0      | 5.1 | SAMD00242882               |
| Aw037     | A         | 261 | 8.58  | milk & solid      | no          | no         | 124.5   | 2.4     | 0.0       | 9.2        | 7.4      | 0.0     | 0.0         | 0.0         | 0.0      | 4.8 | SAMD00242883               |
| Aw038     | A         | 269 | 8.84  | milk & solid      | no          | no         | 157.5   | 9.9     | 0.0       | 11.6       | 5.8      | 0.0     | 0.0         | 0.0         | 0.0      | 5.8 | SAMD00242884               |
| Aw039     | A         | 275 | 9.04  | milk & solid      | no          | no         | 133.6   | 12.5    | 0.0       | 5.9        | 0.0      | 0.0     | 0.0         | 0.0         | 0.0      | 4.9 | SAMD00242885               |
| Aw040     | A         | 282 | 9.27  | milk & solid      | no          | no         | 126.6   | 0.0     | 0.0       | 15.0       | 0.0      | 0.0     | 0.0         | 0.0         | 0.0      | 5.2 | SAMD00242886               |
| Aw041     | A         | 289 | 9.50  | milk & solid      | no          | no         | 120.2   | 5.7     | 0.0       | 9.2        | 0.0      | 0.0     | 0.0         | 0.0         | 0.0      | 5.3 | SAMD00242887               |
| Aw042     | A         | 296 | 9.73  | milk & solid      | no          | no         | 110.9   | 3.5     | 0.0       | 13.9       | 0.0      | 0.0     | 0.0         | 0.0         | 0.0      | 5.4 | SAMD00242888               |
| Aw043     | A         | 303 | 9.96  | milk & solid      | no          | no         | 91.8    | 12.3    | 0.0       | 15.8       | 0.0      | 10.5    | 0.0         | 0.0         | 0.0      | 5.4 | SAMD00242889               |
| Aw044     | A         | 310 | 10.19 | milk & solid      | no          | no         | 128.1   | 2.2     | 0.0       | 34.4       | 0.0      | 0.0     | 0.0         | 0.0         | 0.0      | 5.2 | SAMD00242890               |
| Aw045     | A         | 316 | 10.39 | milk & solid      | no          | no         | 96.7    | 0.0     | 0.0       | 37.0       | 0.0      | 0.0     | 0.0         | 0.0         | 0.0      | 5.6 | SAMD00242891               |
| Aw046     | A         | 324 | 10.65 | milk & solid      | no          | no         | 55.1    | 0.0     | 0.0       | 16.7       | 0.0      | 0.0     | 0.0         | 0.0         | 0.0      | 5.7 | SAMD00242892               |
| Aw047     | A         | 331 | 10.88 | milk & solid      | no          | no         | 41.6    | 0.0     | 0.0       | 14.8       | 0.0      | 0.0     | 0.0         | 0.0         | 0.0      | 5.3 | SAMD00242893               |
| Aw048     | A         | 338 | 11.11 | solid             | no          | no         | 42.3    | 0.0     | 8.7       | 22.6       | 0.0      | 0.0     | 0.0         | 0.0         | 0.0      | 5.5 | SAMD00242894               |
| Aw049     | A         | 345 | 11.34 | solid             | no          | no         | 70.3    | 0.0     | 4.0       | 26.9       | 3.8      | 0.0     | 0.0         | 0.0         | 0.0      | 5.0 | SAMD00242895               |
| Aw050     | A         | 352 | 11.57 | solid             | no          | no         | 75.4    | 3.7     | 25.0      | 14.9       | 3.5      | 5.2     | 0.0         | 0.0         | 0.0      | 6.7 | SAMD00242896               |
| Aw051     | A         | 359 | 11.80 | solid             | no          | no         | 91.3    | 0.0     | 17.6      | 24.5       | 6.0      | 0.0     | 0.0         | 0.0         | 0.0      | 6.6 | SAMD00242897               |
| Aw052     | A         | 366 | 12.03 | solid             | no          | no         | 51.5    | 0.0     | 30.0      | 9.2        | 2.7      | 0.0     | 0.0         | 0.0         | 0.0      | 7.7 | SAMD00242898               |
| Aw058     | A         | 402 | 13.22 | solid             | no          | no         | 23.5    | 0.0     | 31.7      | 13.1       | 0.0      | 0.0     | 0.0         | 0.0         | 0.0      | 7.4 | SAMD00242899               |
| Aw060     | A         | 417 | 13.71 | solid             | no          | no         | 53.5    | 4.4     | 23.0      | 6.3        | 0.0      | 0.0     | 0.0         | 0.0         | 0.0      | 6.5 | SAMD00242900               |
| Aw062     | A         | 428 | 14.07 | solid             | no          | no         | 34.0    | 0.0     | 13.9      | 11.8       | 0.0      | 0.0     | 0.0         | 0.0         | 0.0      | 6.8 | SAMD00242901               |
| Aw066     | A         | 457 | 15.02 | solid             | no          | no         | 62.0    | 0.0     | 0.0       | 28.8       | 0.0      | 0.0     | 0.0         | 0.0         | 0.0      | 7.8 | SAMD00242902               |
| Aw070     | A         | 491 | 16.14 | solid             | no          | no         | 64.3    | 8.2     | 0.0       | 20.9       | 3.9      | 0.0     | 0.0         | 0.0         | 0.0      | 7.0 | SAMD00242903               |
| Aw074     | A         | 522 | 17.16 | solid             | no          | no         | 41.3    | 0.0     | 0.0       | 15.2       | 0.0      | 0.0     | 0.0         | 0.0         | 0.0      | 7.7 | SAMD00242904               |

Only the information of 70 samples were shown here. The value for all 1,070 samples (1,048 samples from 12 infants and 22 samples from 22 adults) are provided in Excel file.
